# Supplementary material for: Global incidence and mortality of breast cancer: a trend analysis
Source: PubMed Central journal article supplement (PMC7950292; doi:10.18632/aging.202502), 2021-02-11
Supplement: aging-13-202502-s001.pdf [file aging-13-202502-s001.pdf]

**SUPPLEMENTARY FIGURES**

**Latin America & the Caribbean**

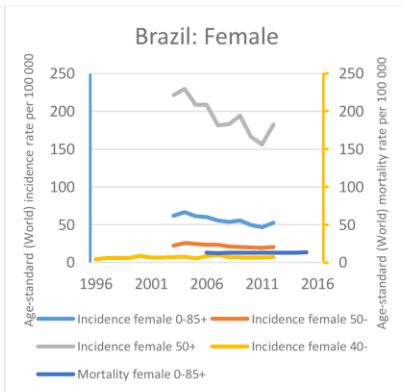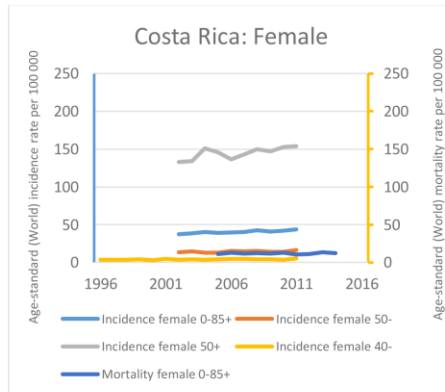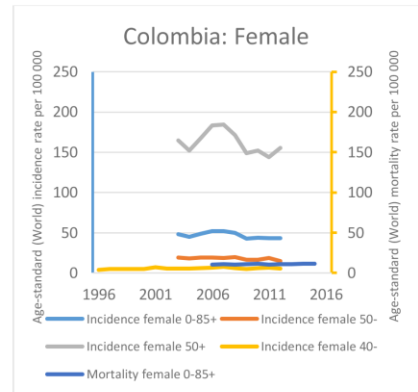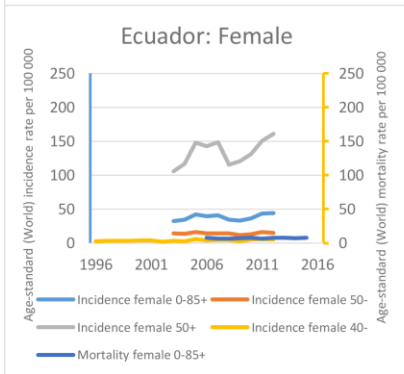

**Northern America**

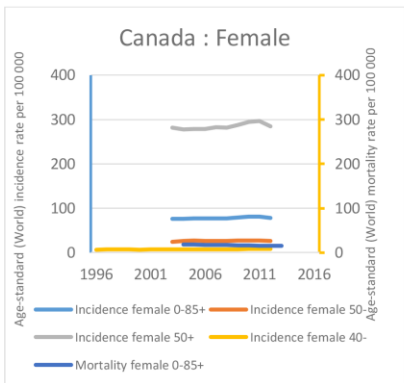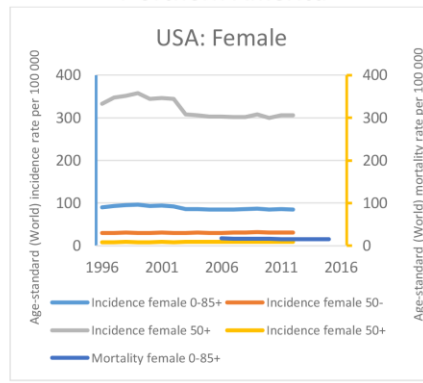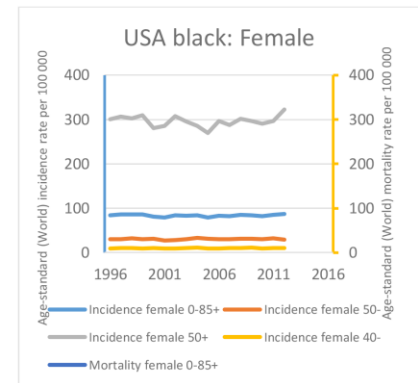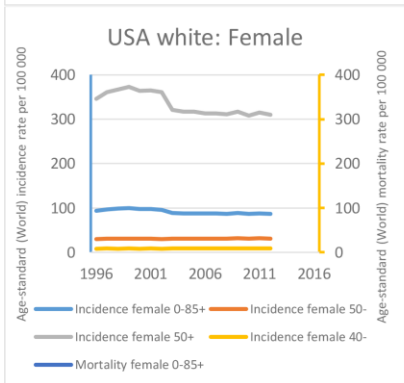

## Asia

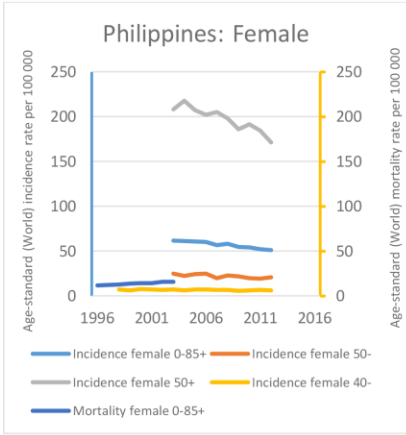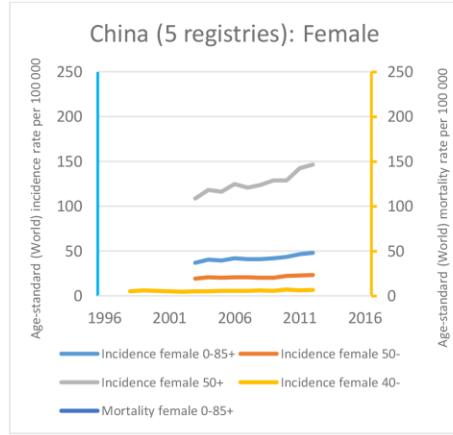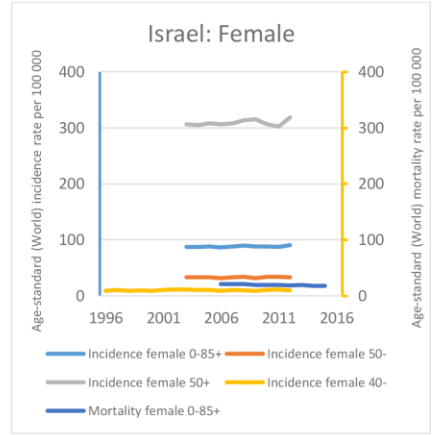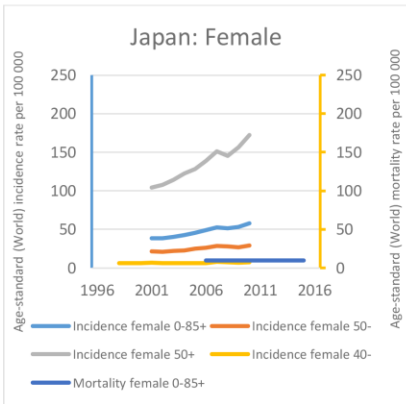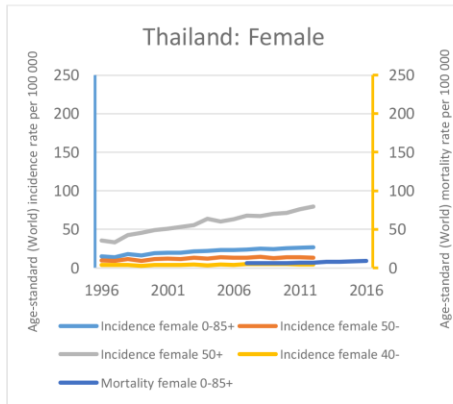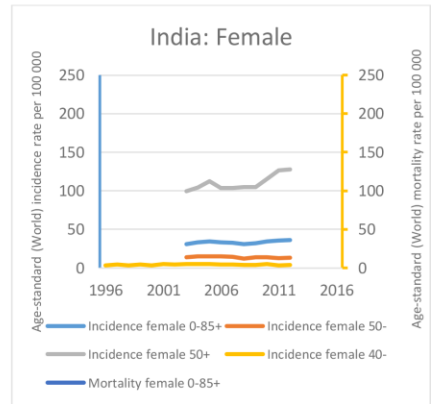

## Oceania

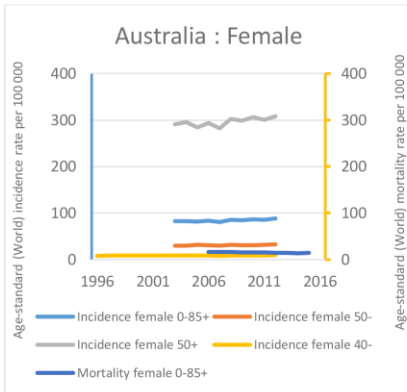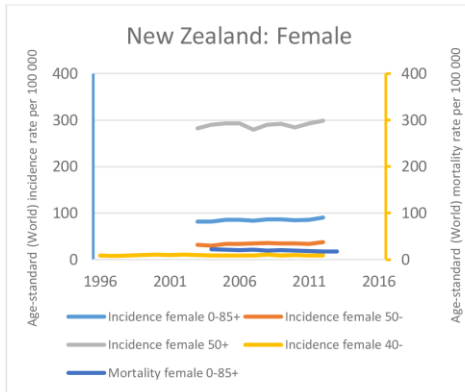

## Northern Europe

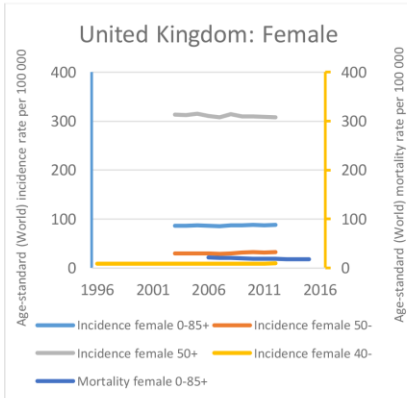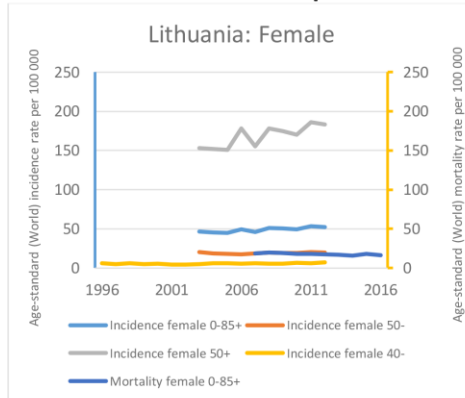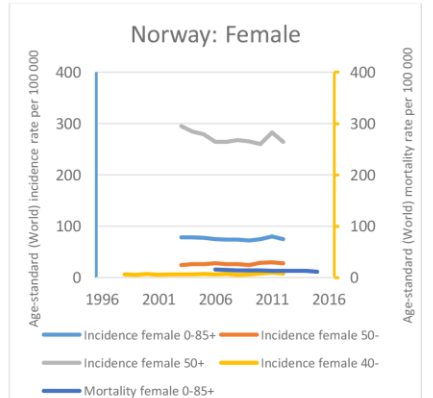

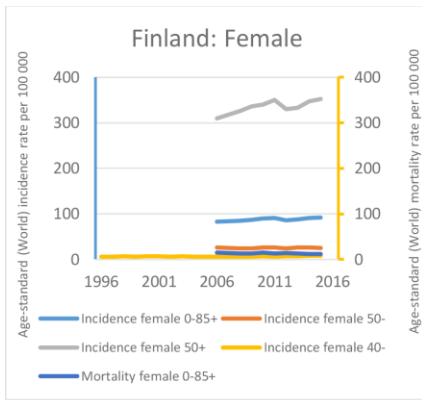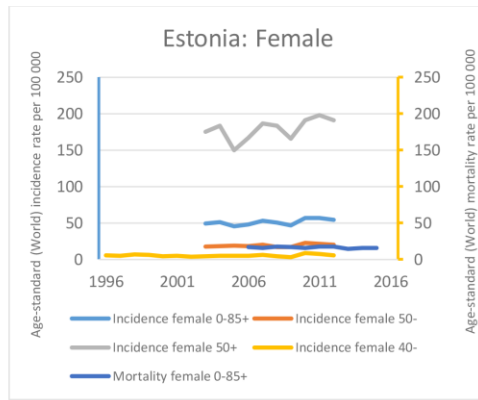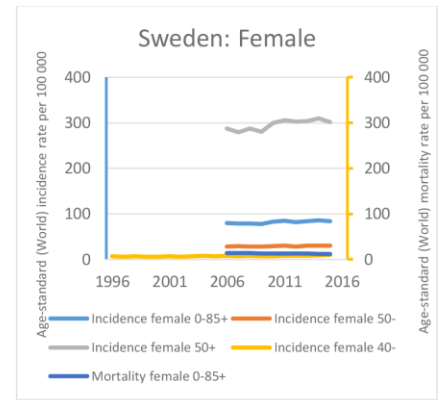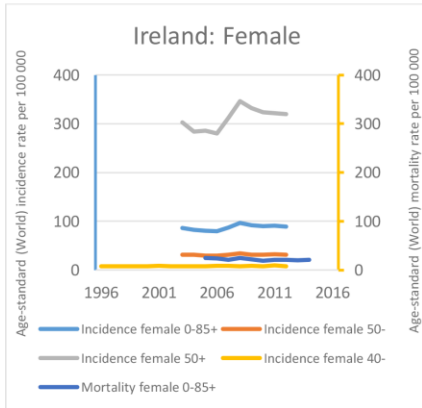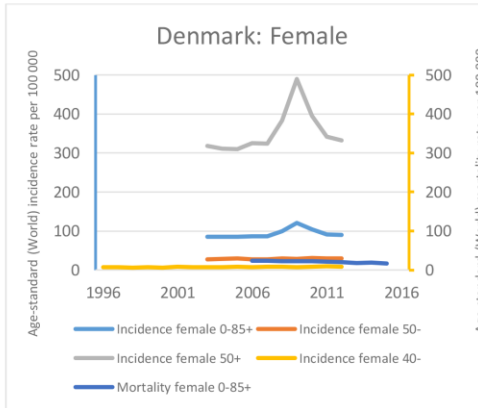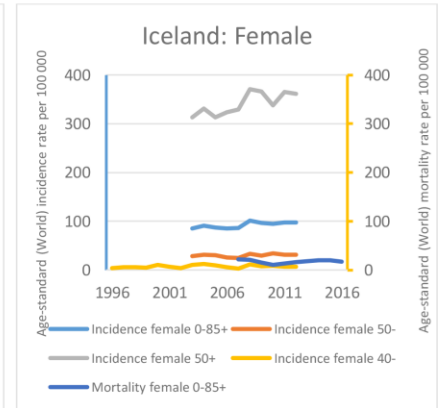

## Western Europe

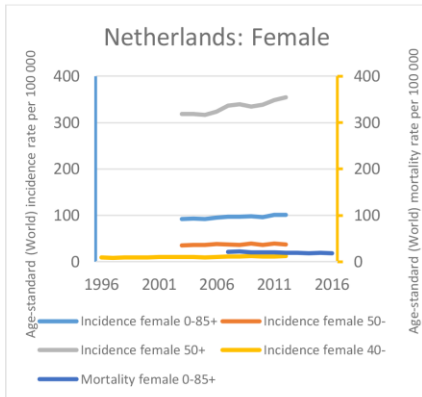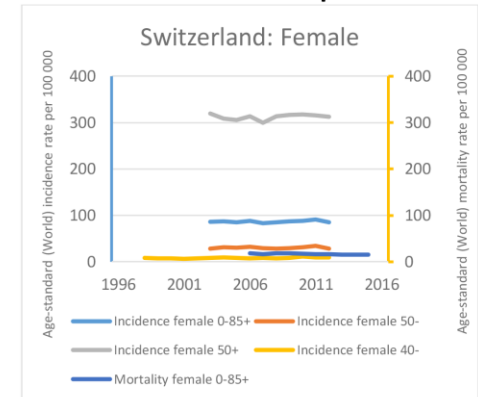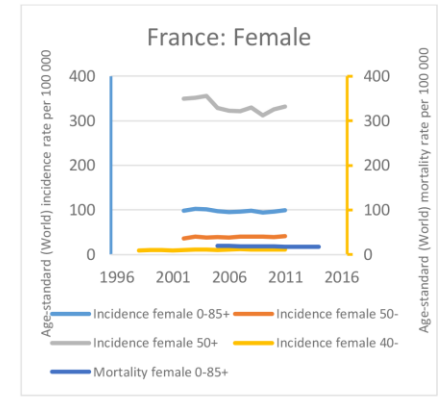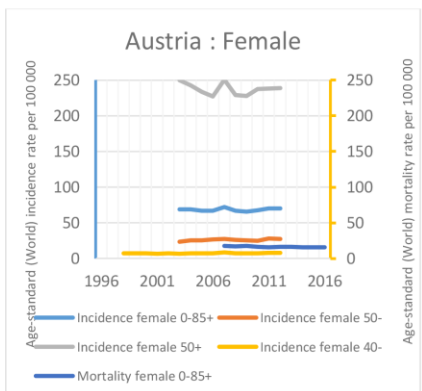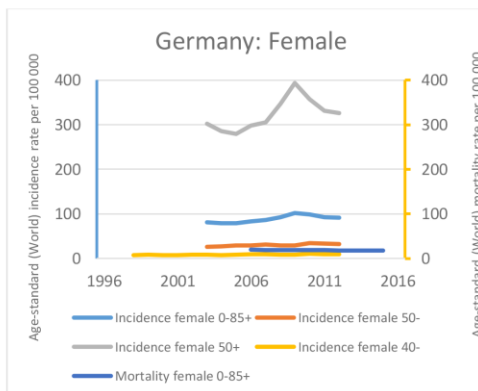

## Southern Europe

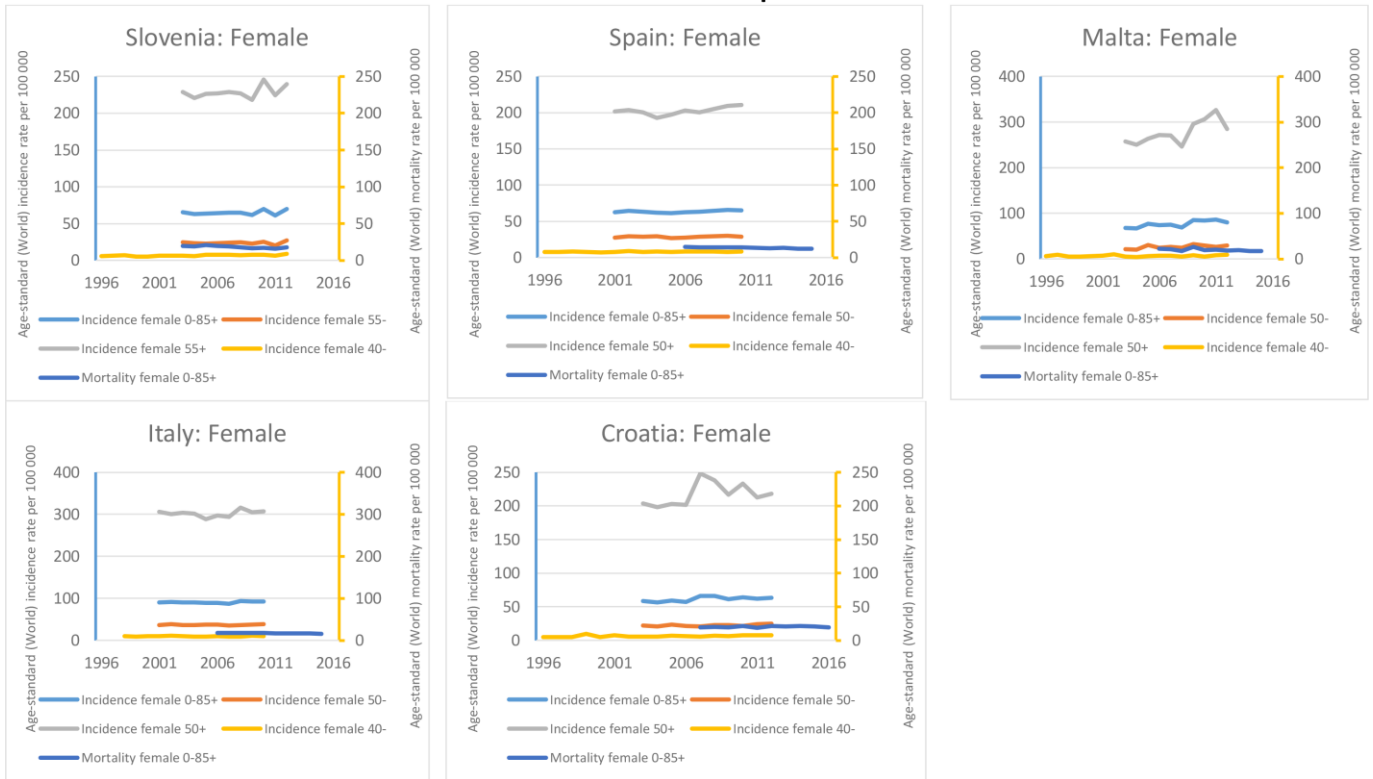

## Eastern Europe

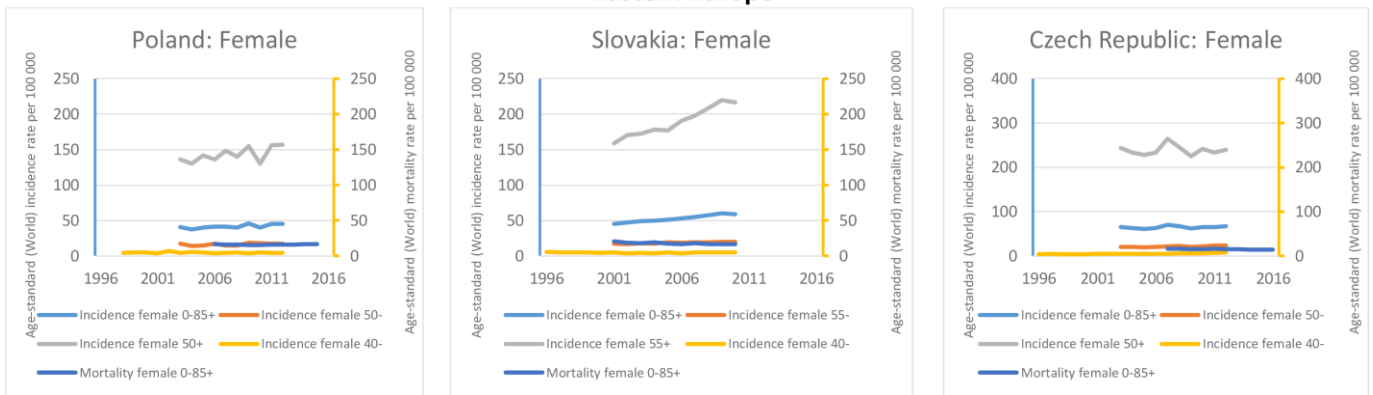

**Supplementary Figure 1. The incidence/mortality trends of breast cancer by country.**



# Latin America & the Caribbean

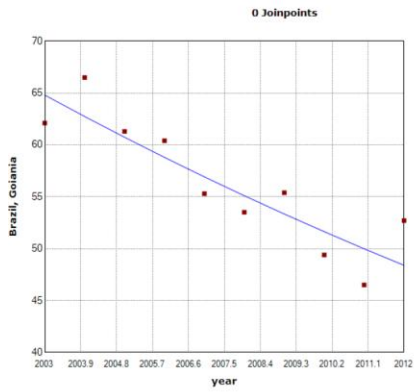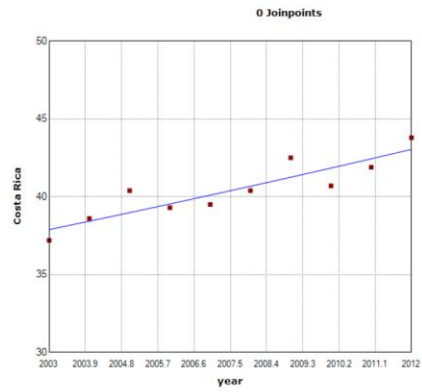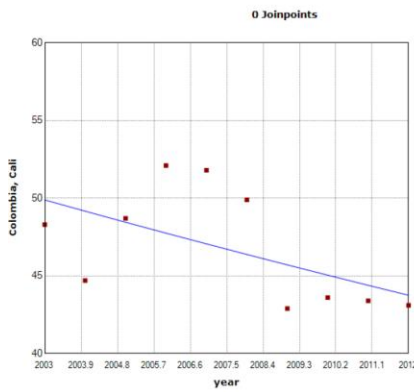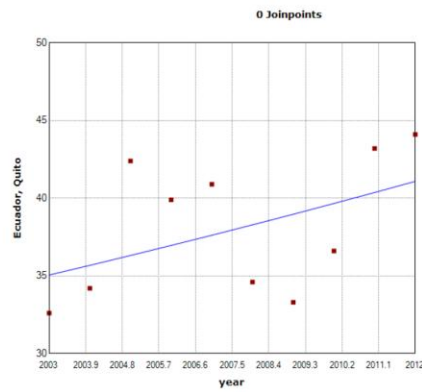

# Northern America

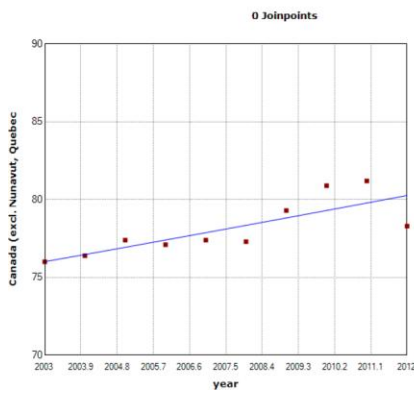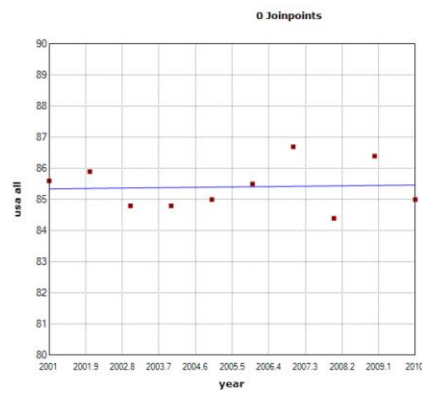

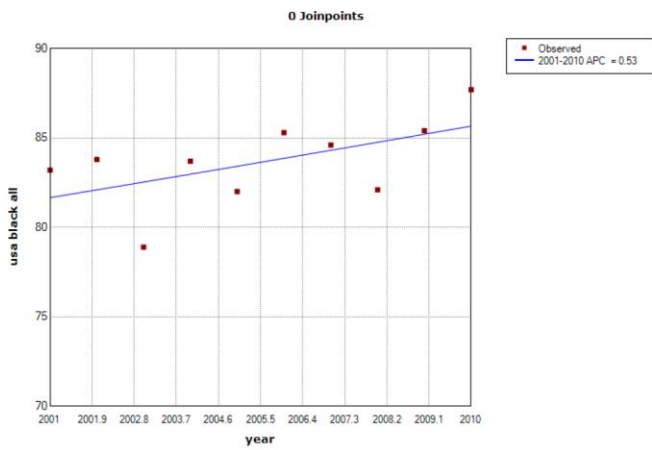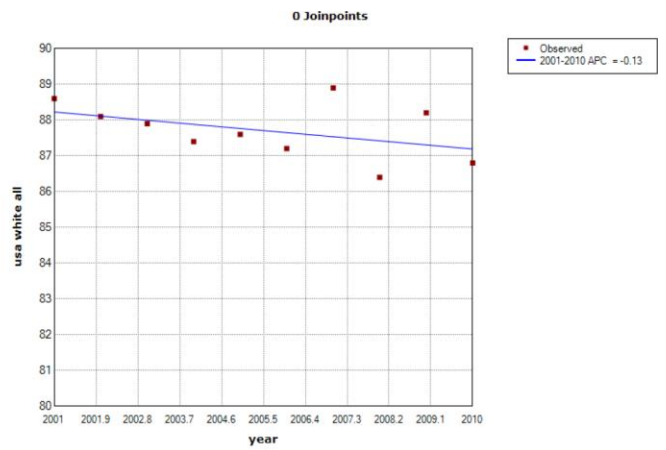

## Asia

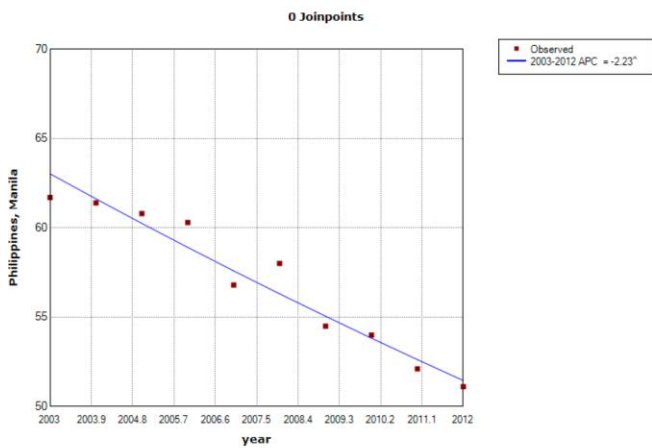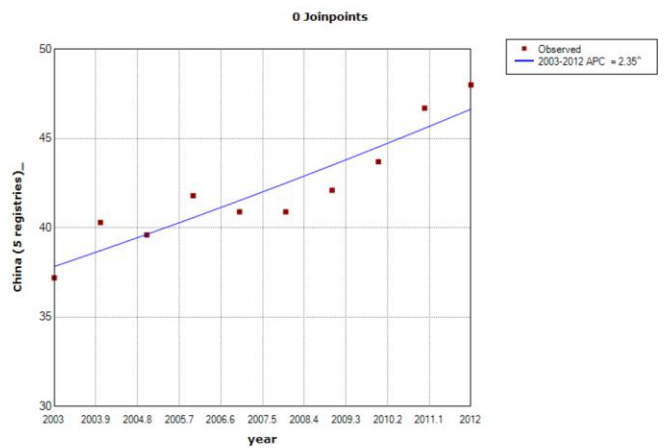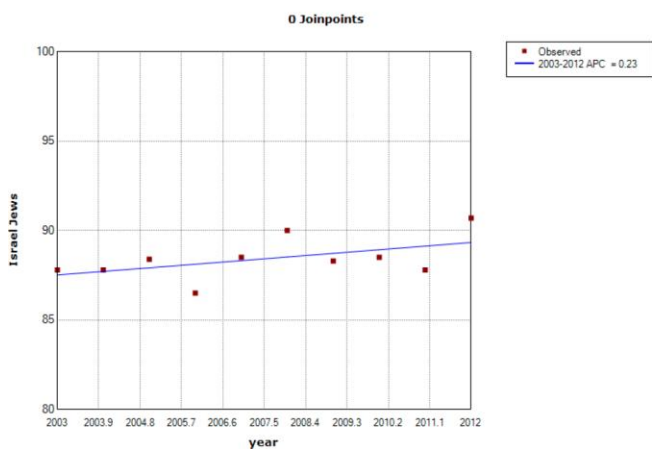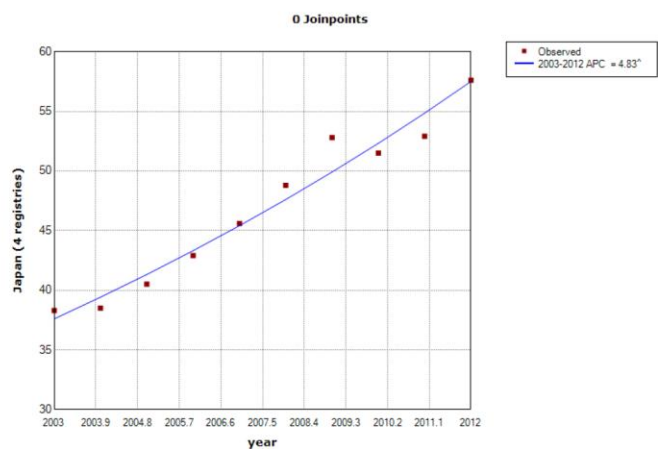

0 Joinpoints

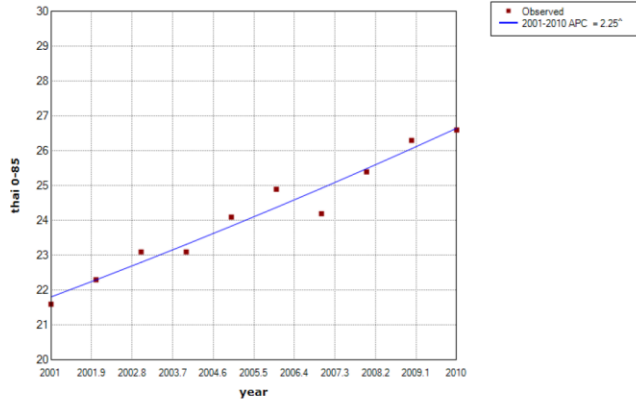

0 Joinpoints

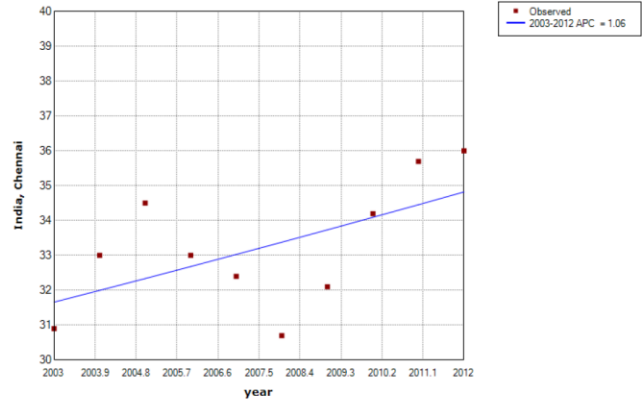

## Oceania

0 Joinpoints

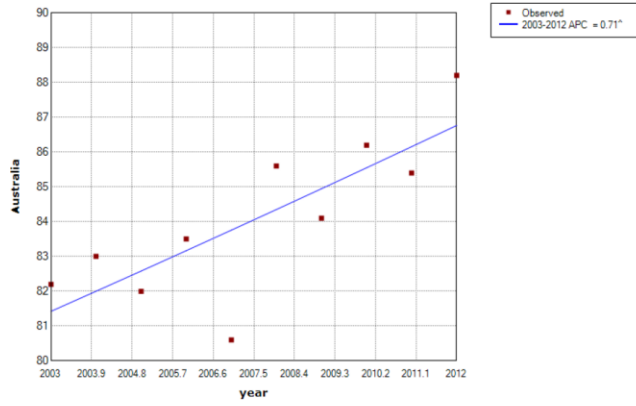

0 Joinpoints

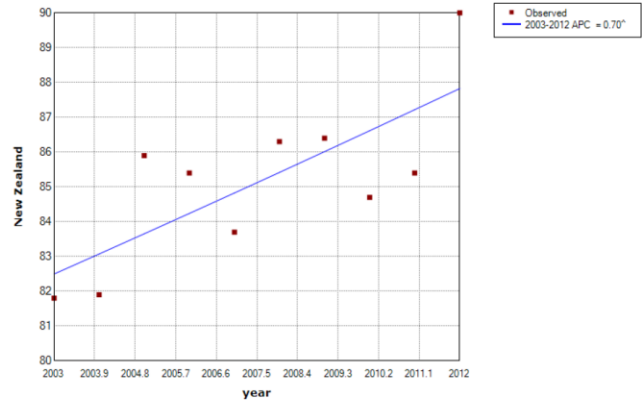

## Northern Europe

0 Joinpoints

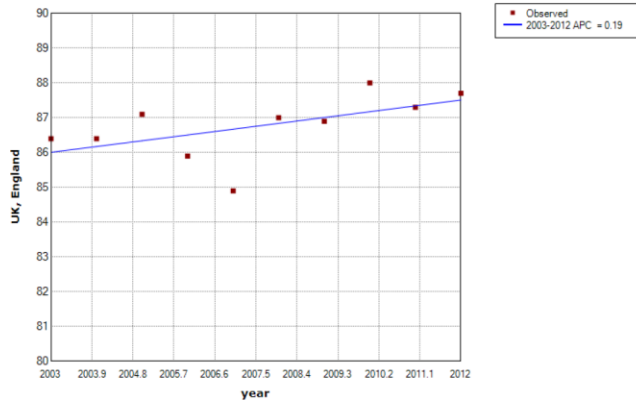

0 Joinpoints

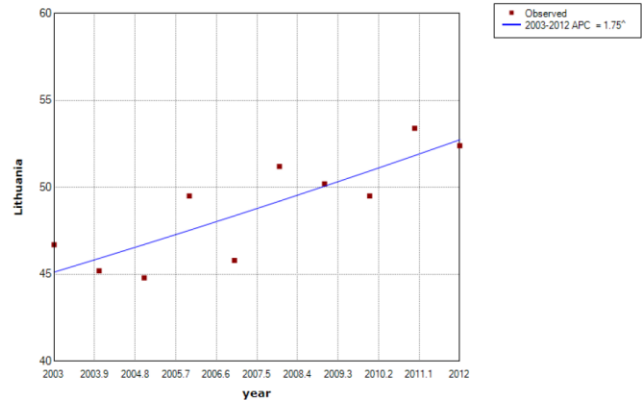

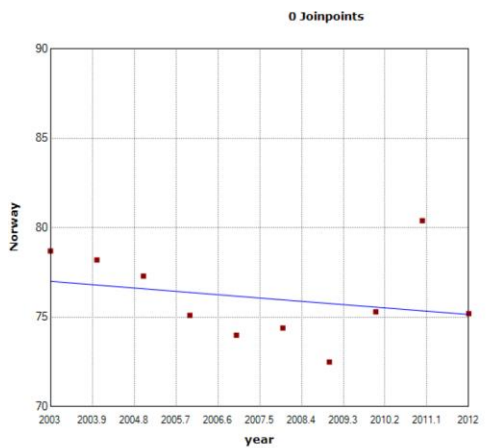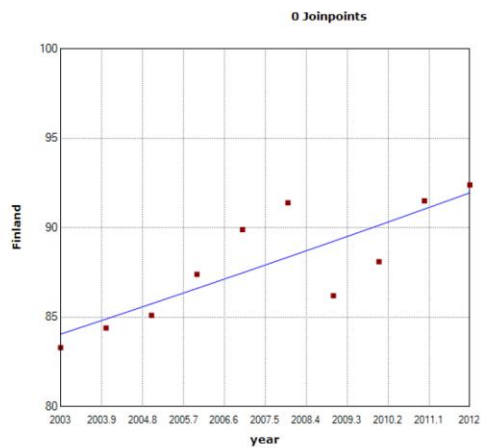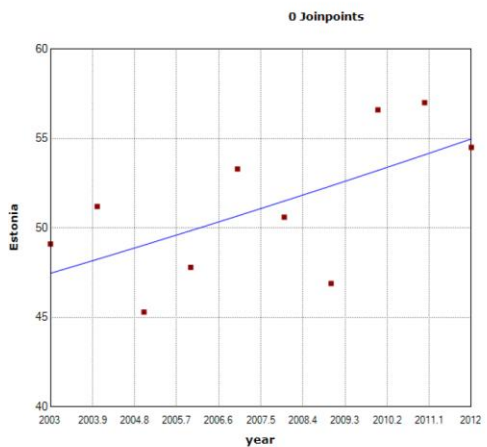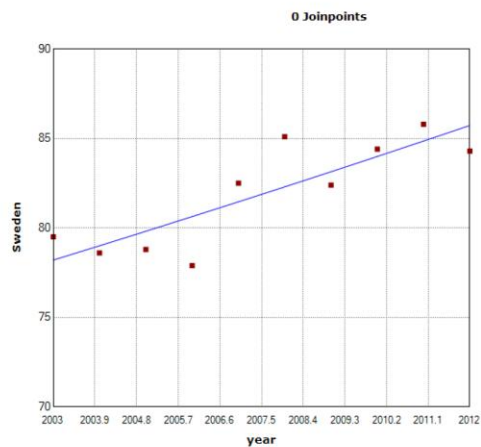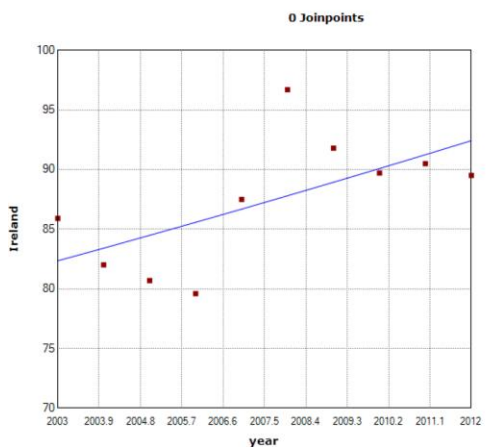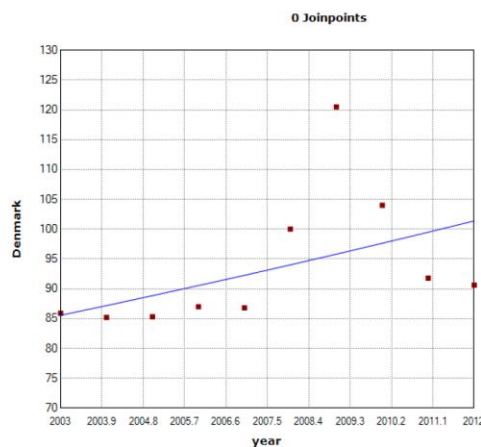

0 Joinpoints

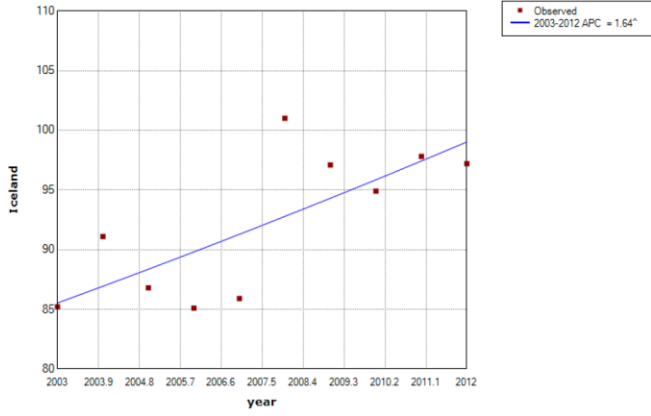

## Western Europe

0 Joinpoints

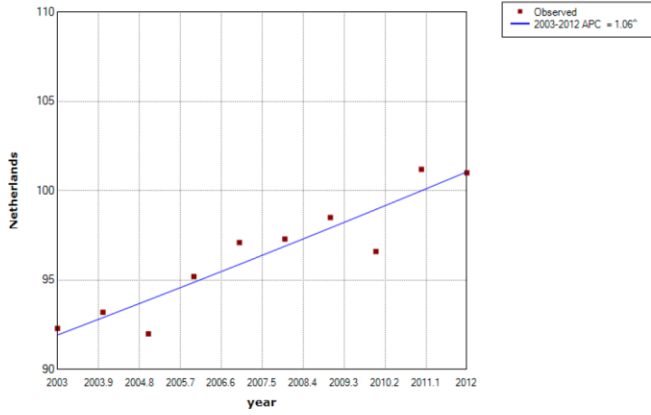

0 Joinpoints

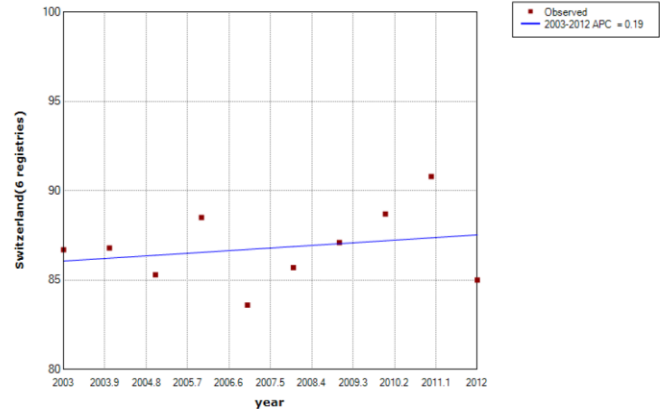

0 Joinpoints

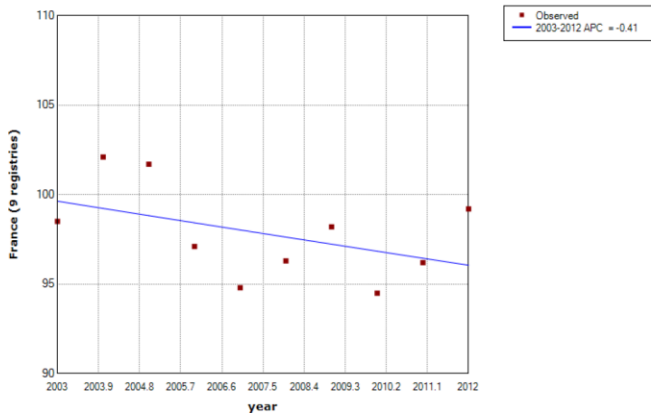

0 Joinpoints

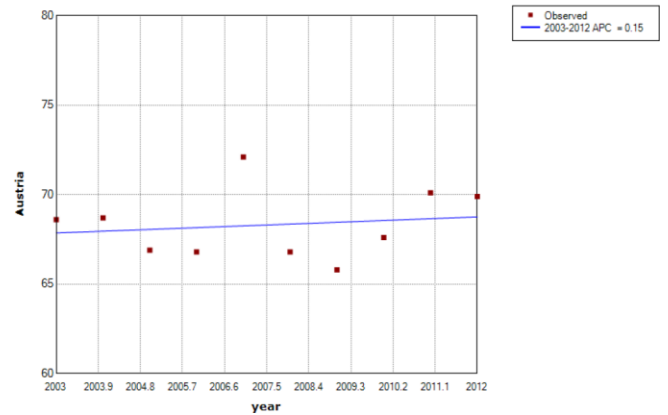

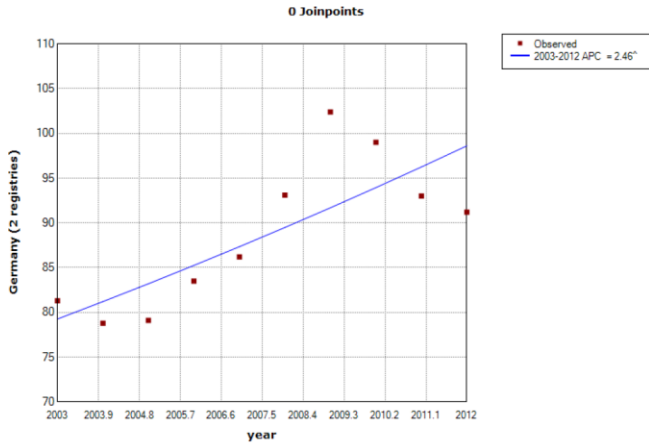

## Southern Europe

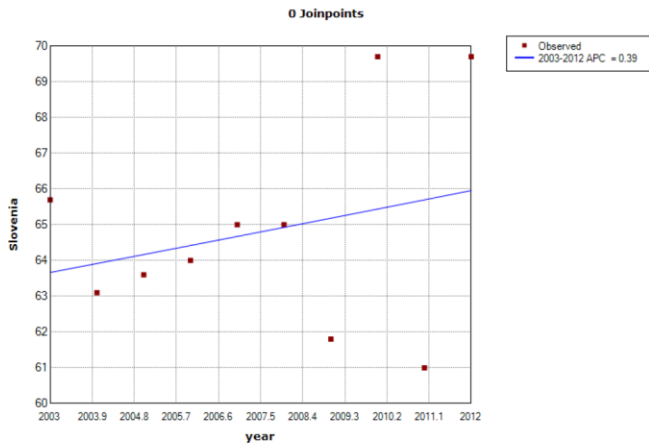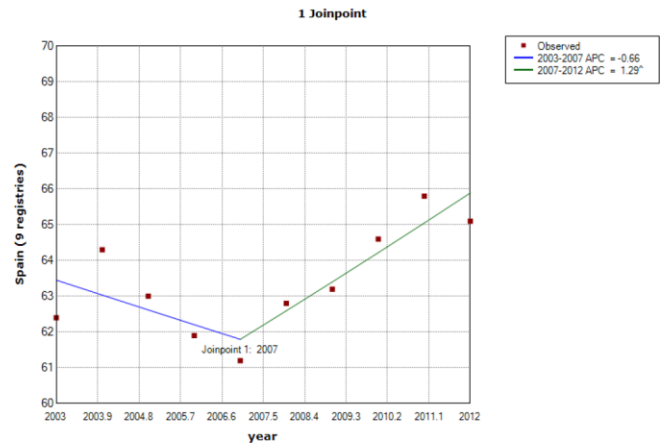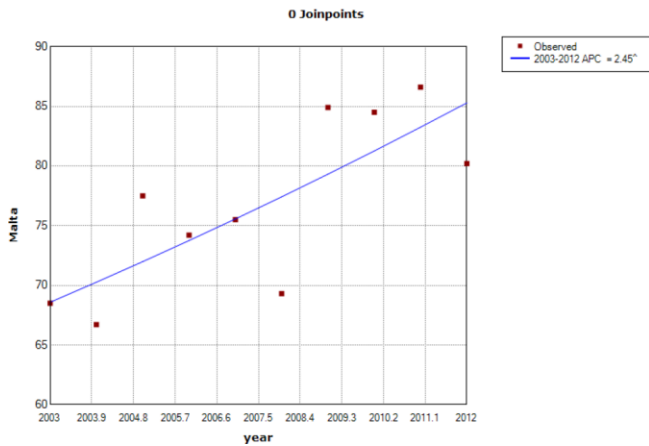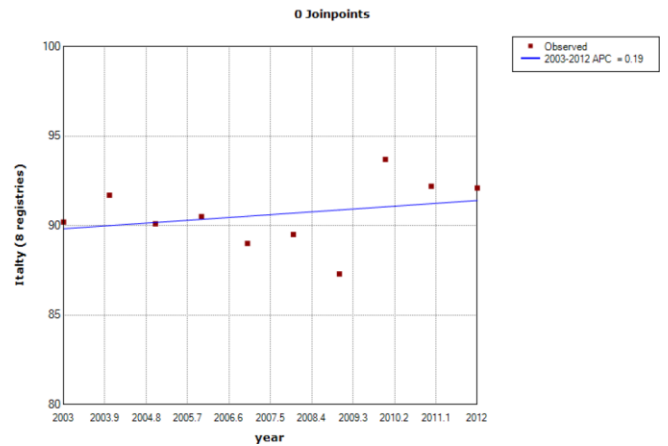

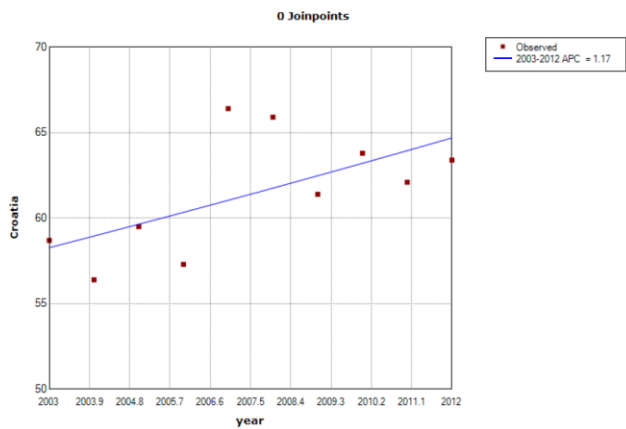

## Eastern Europe

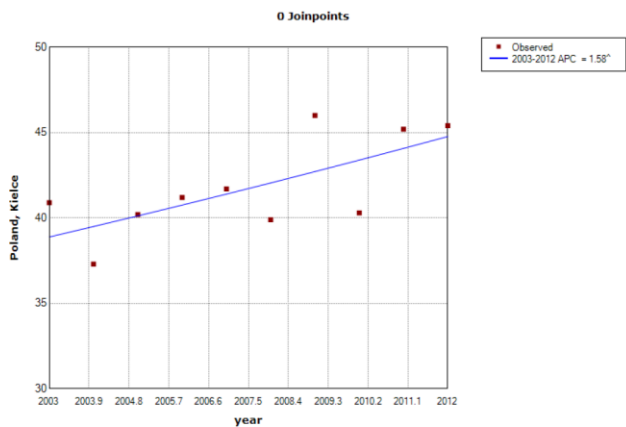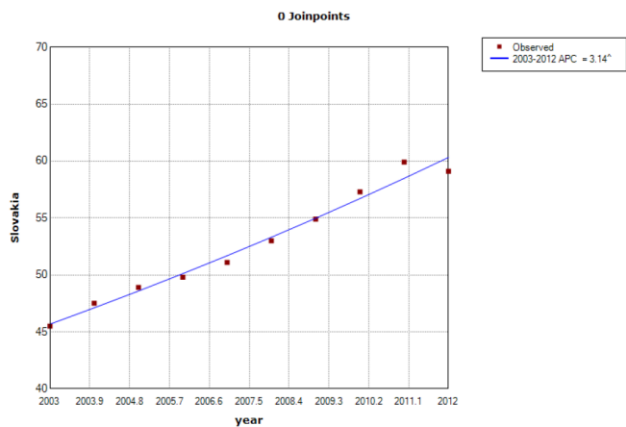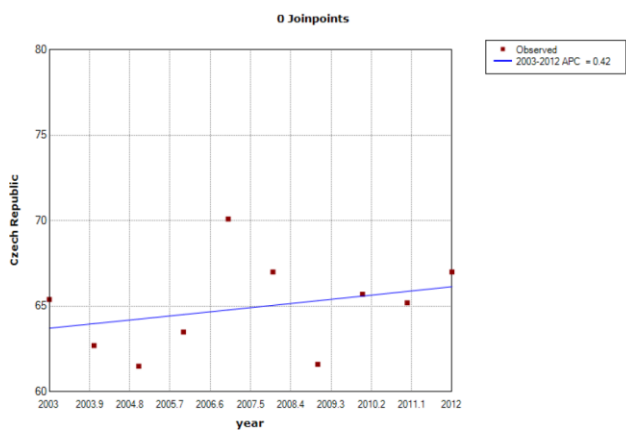

# Latin America & the Caribbean

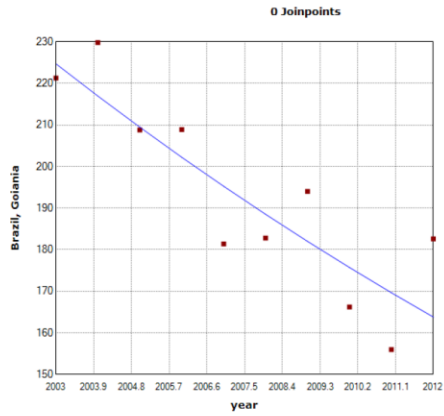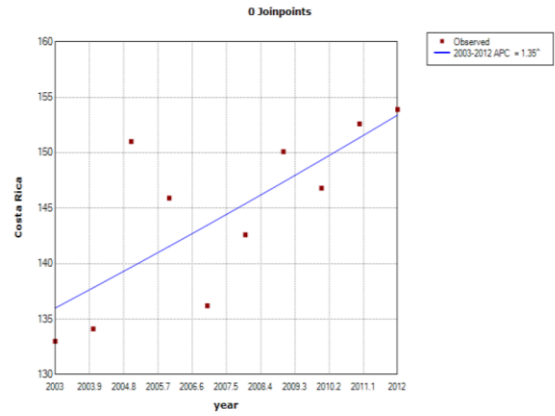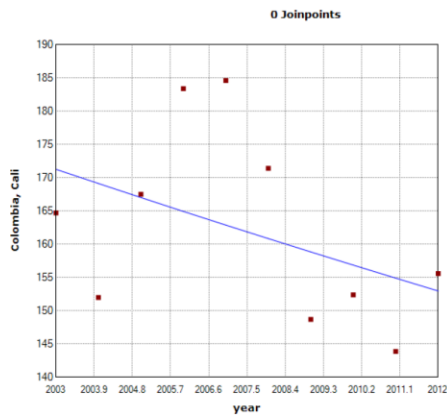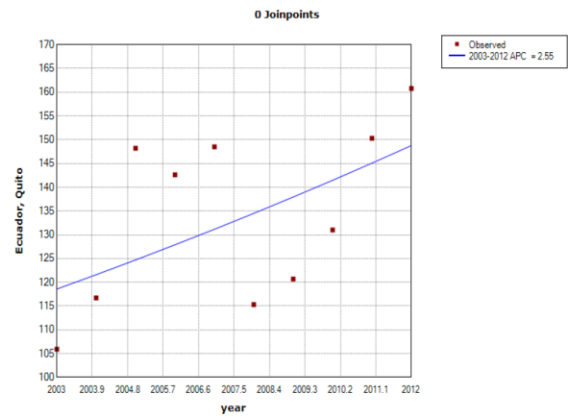

# Northern America

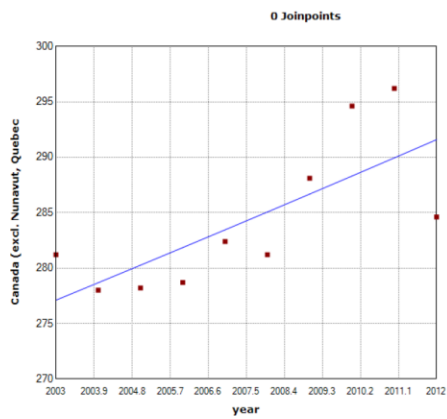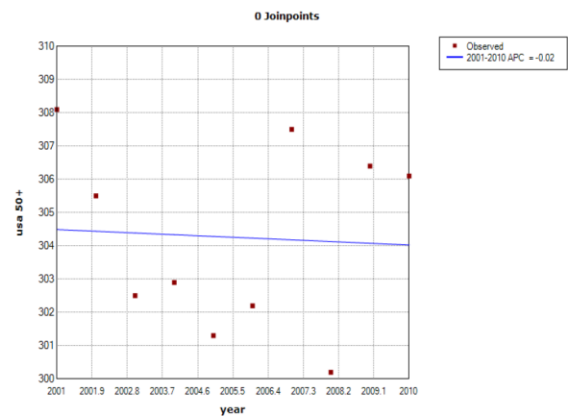



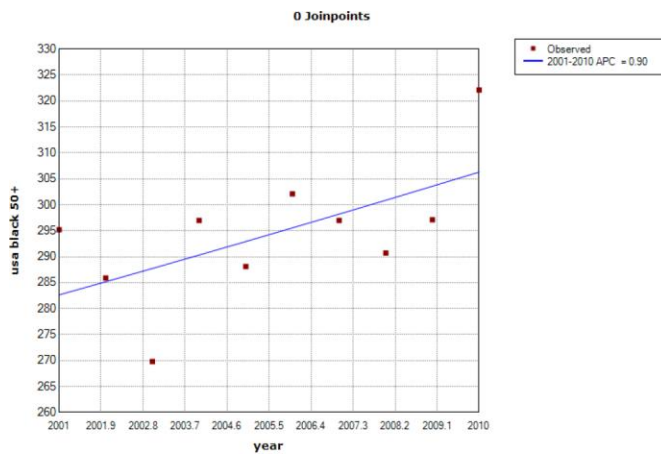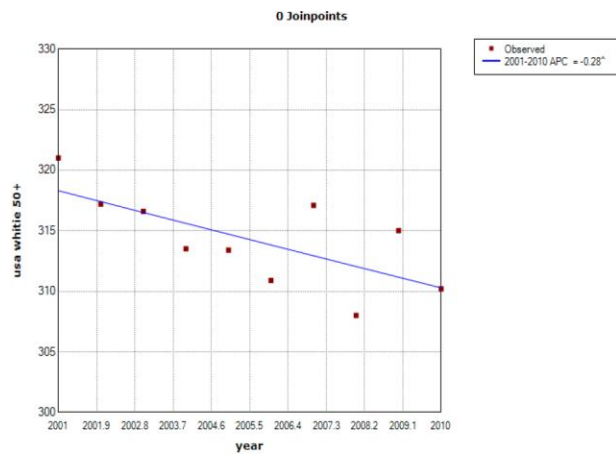

## Asia

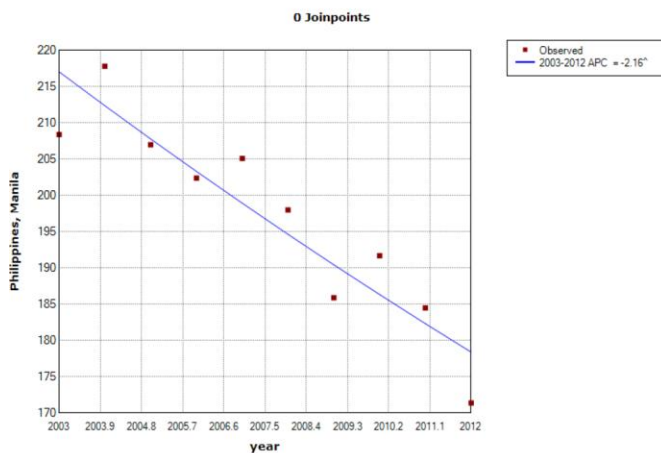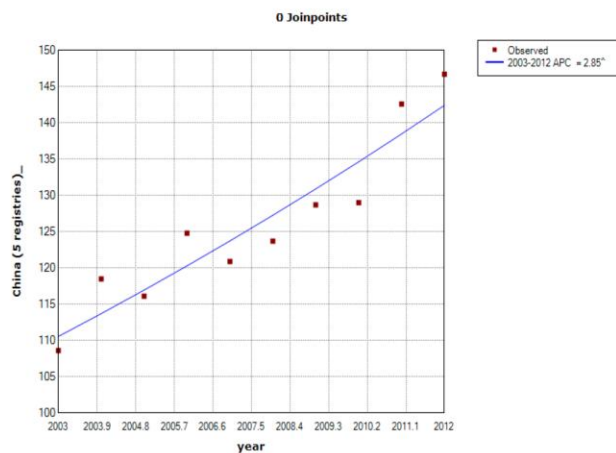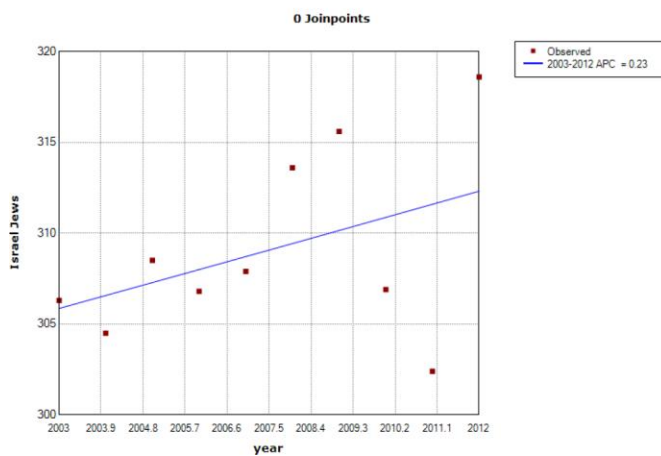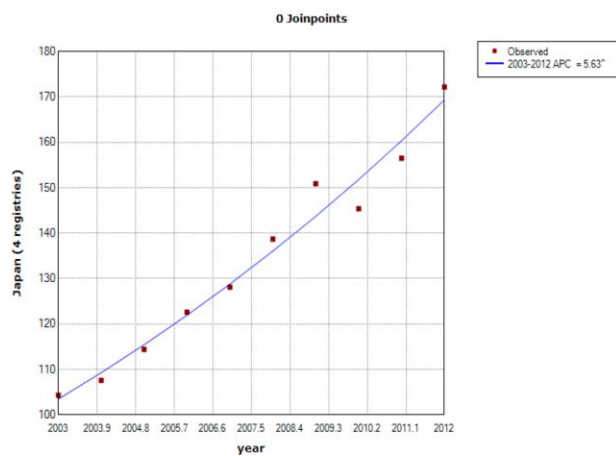

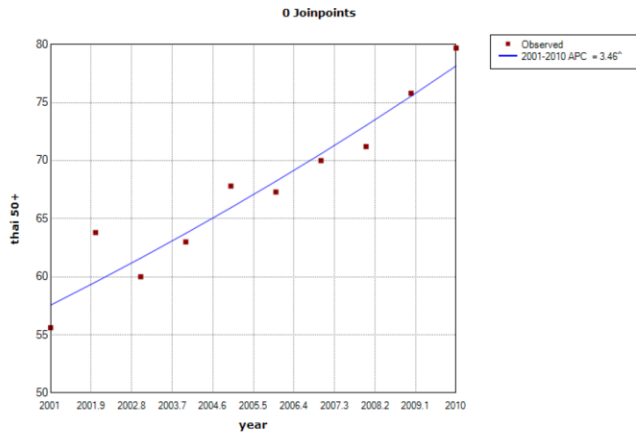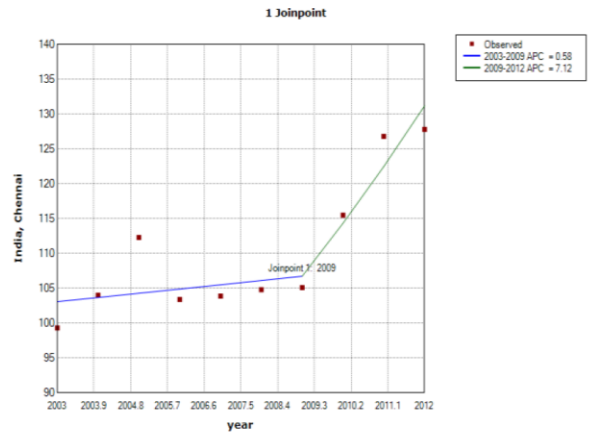

## Oceania

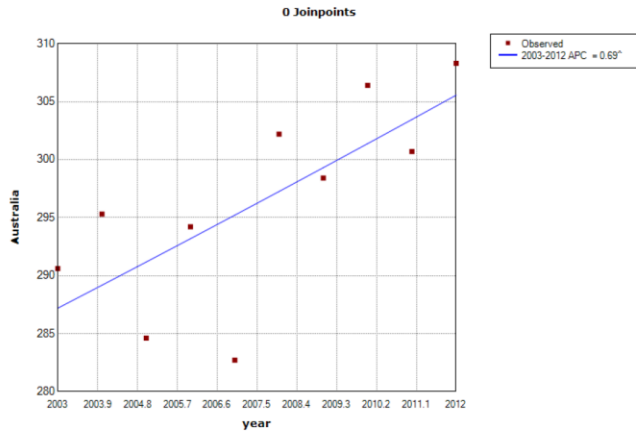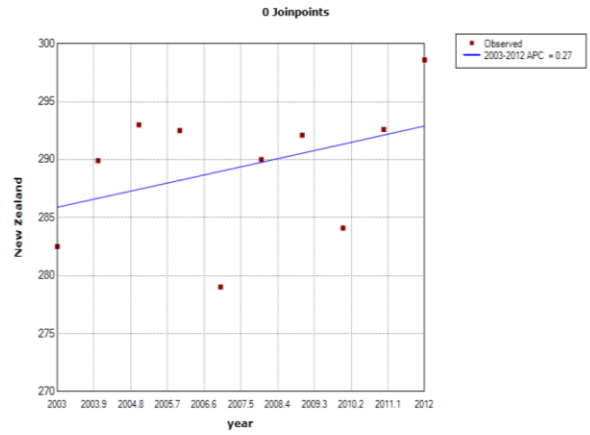

## Northern Europe

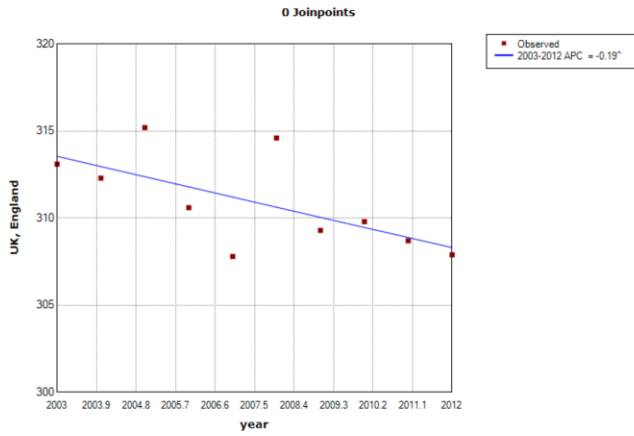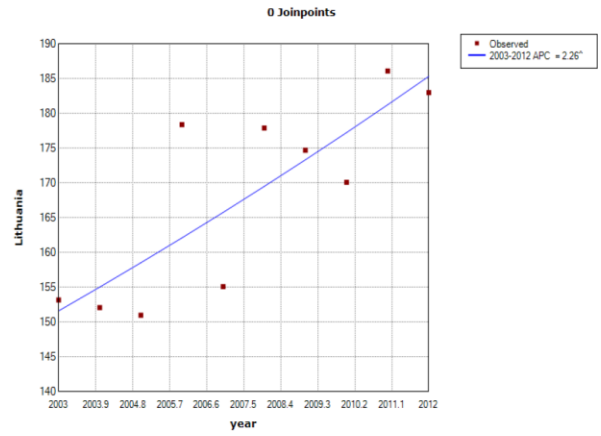

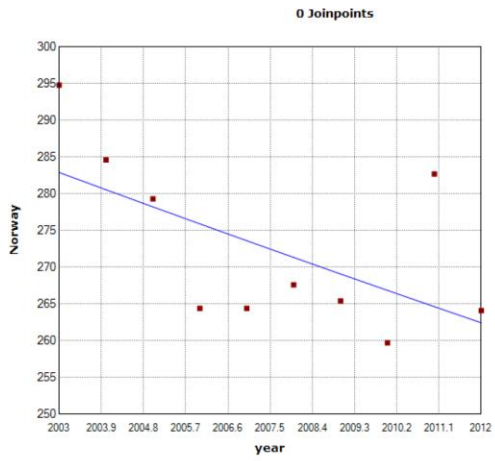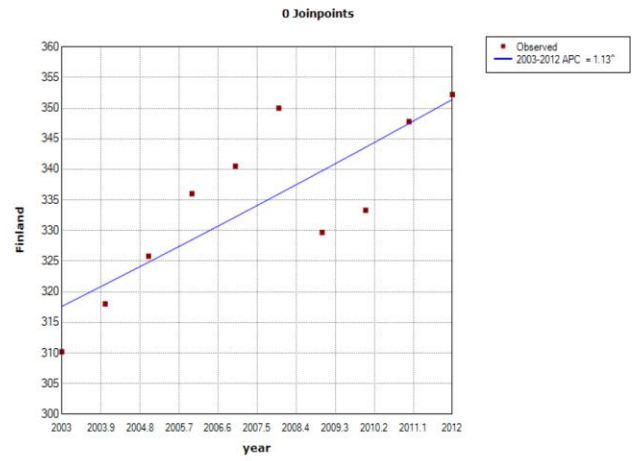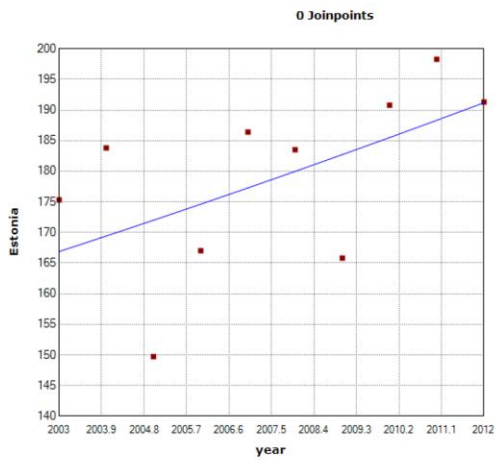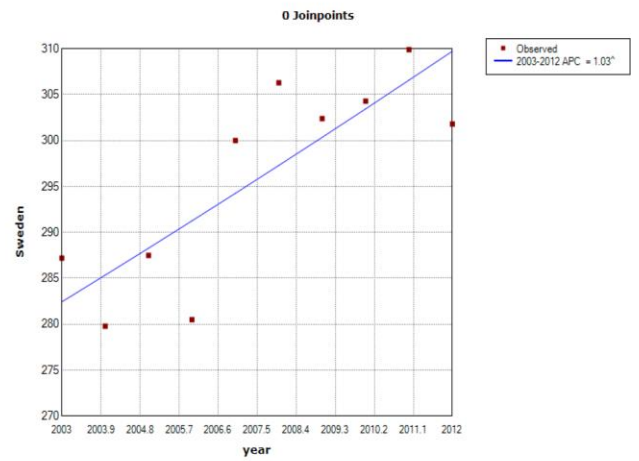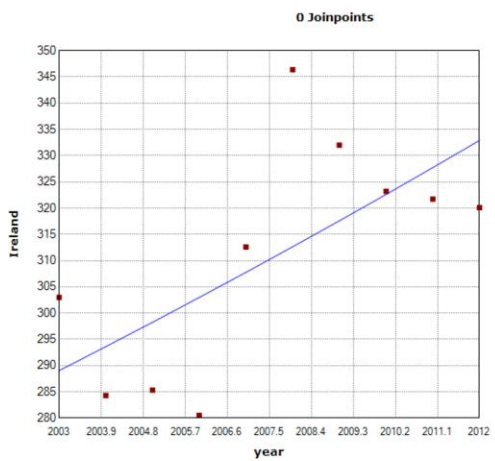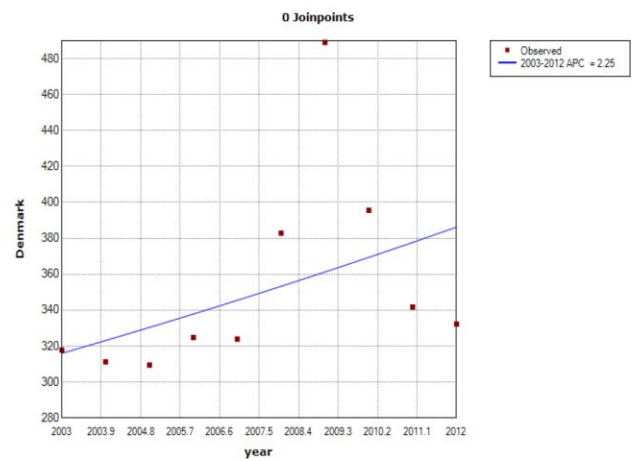

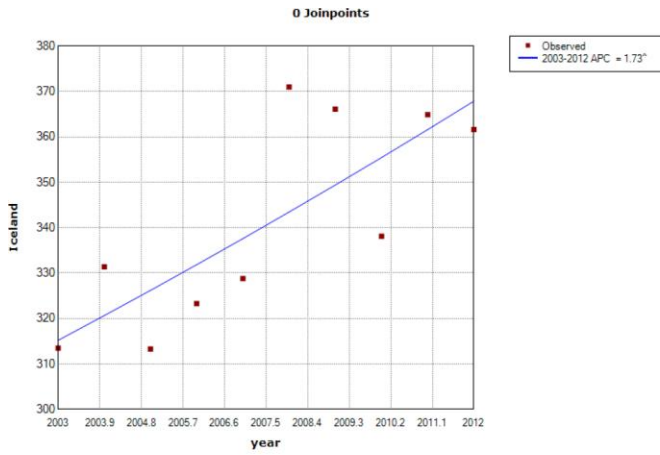

## Western Europe

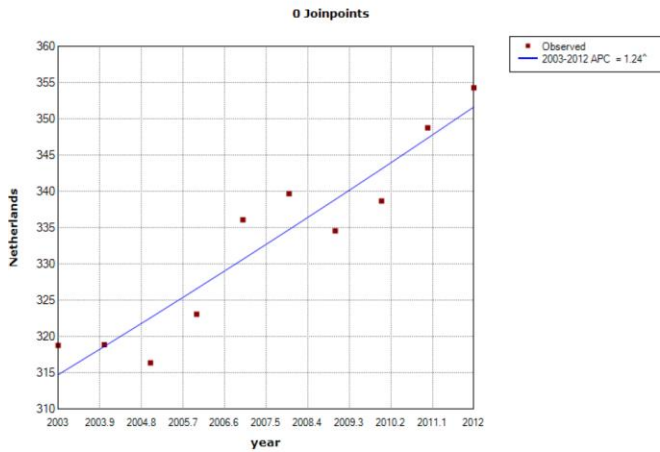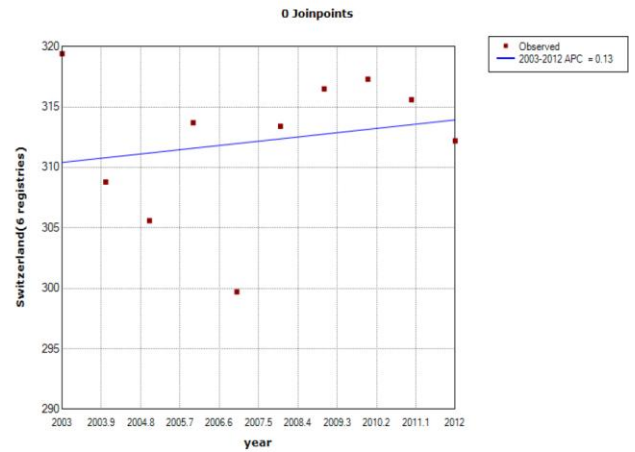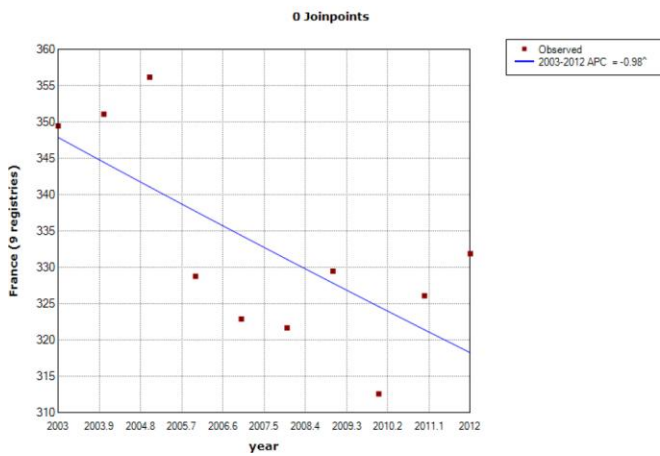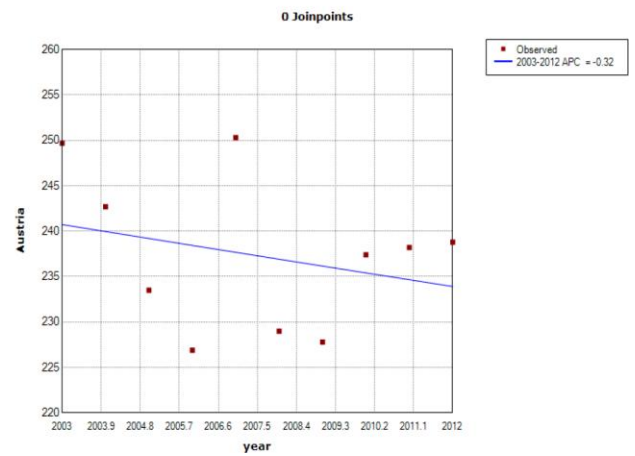

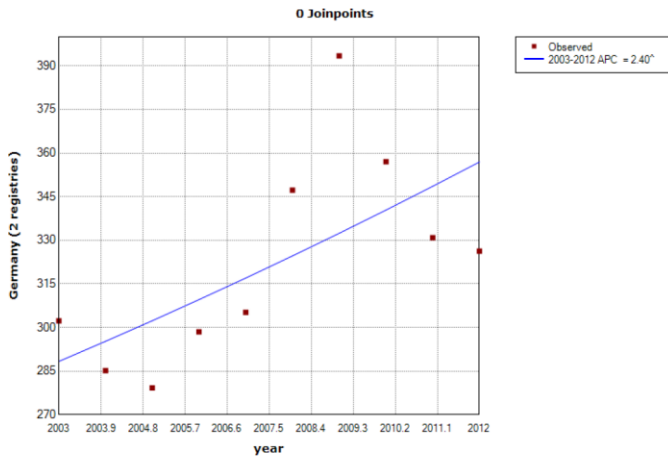

## Southern Europe

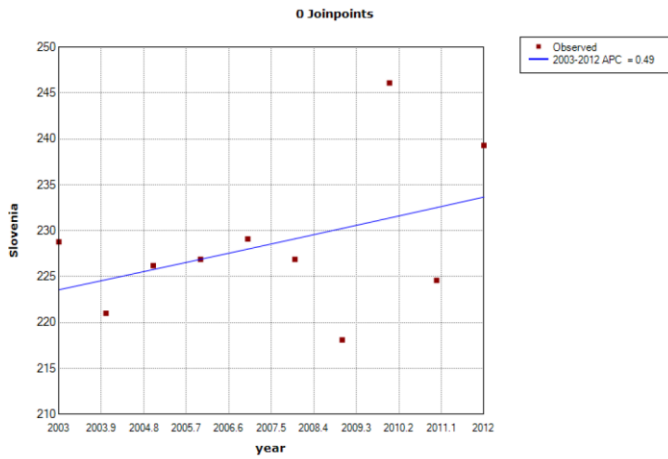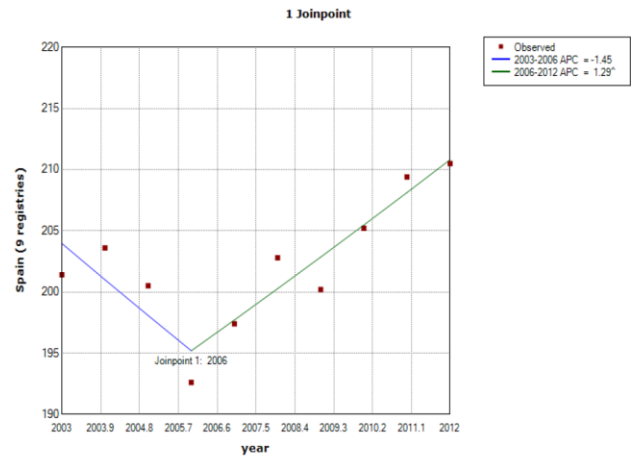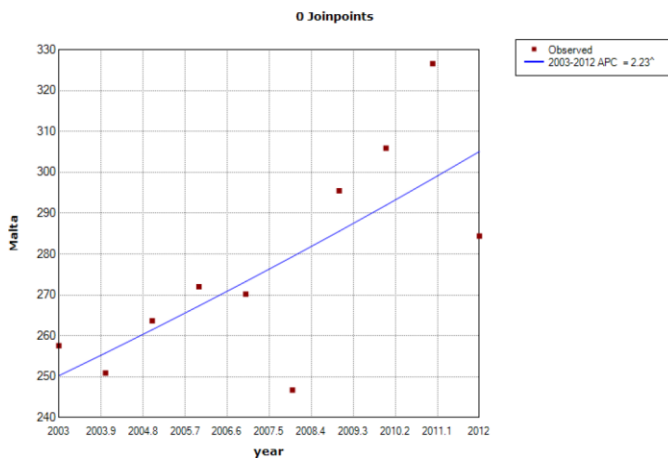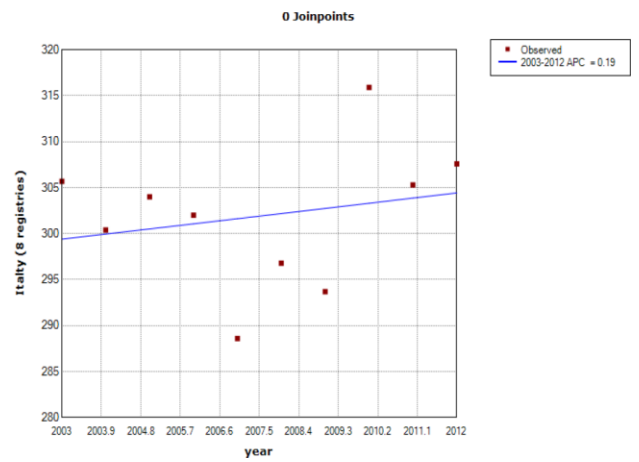

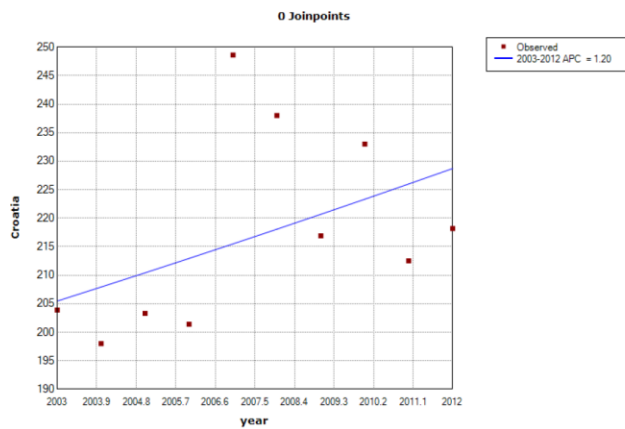

## Eastern Europe

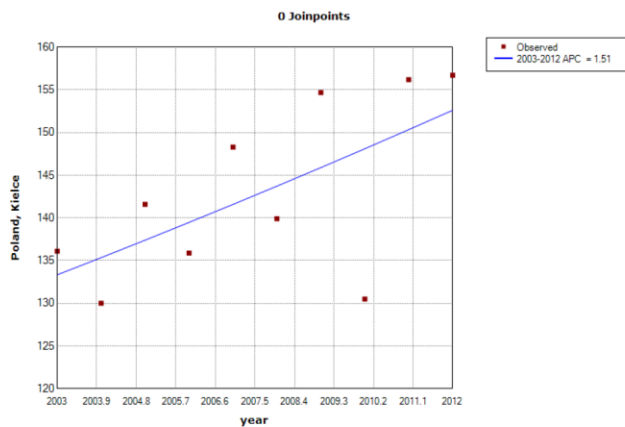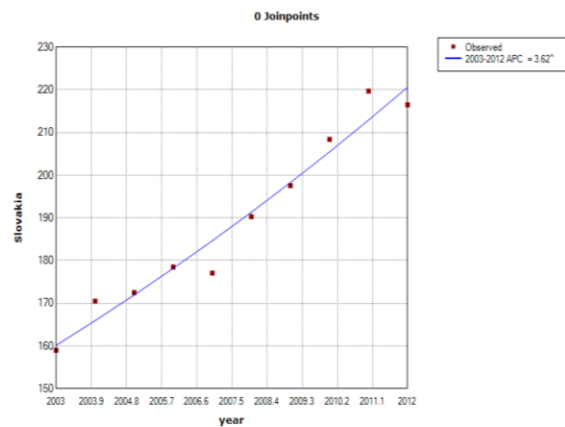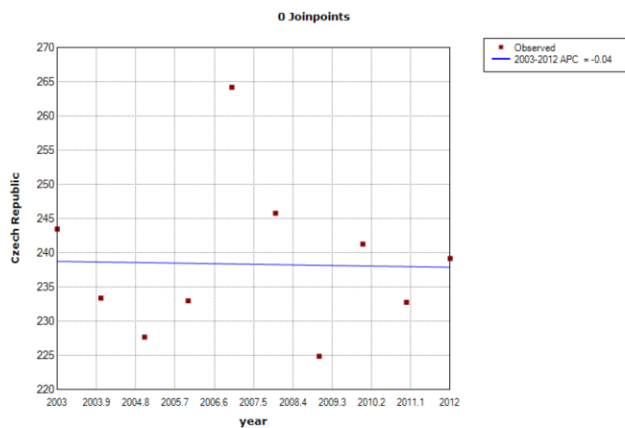

# Latin America & the Caribbean

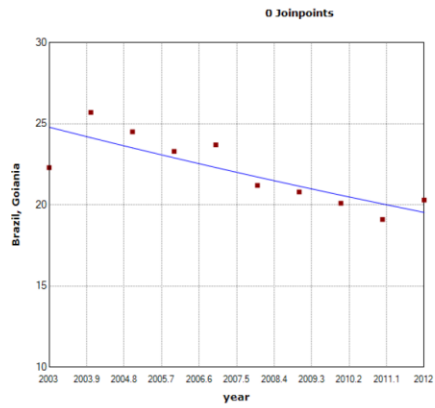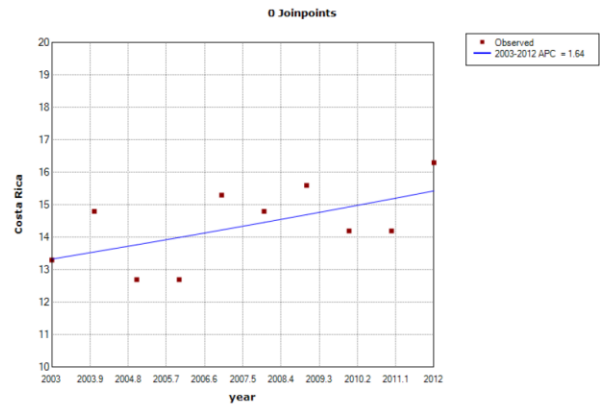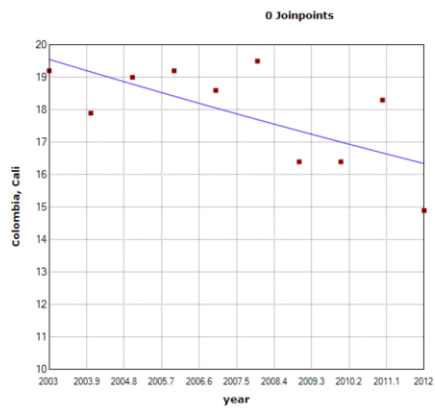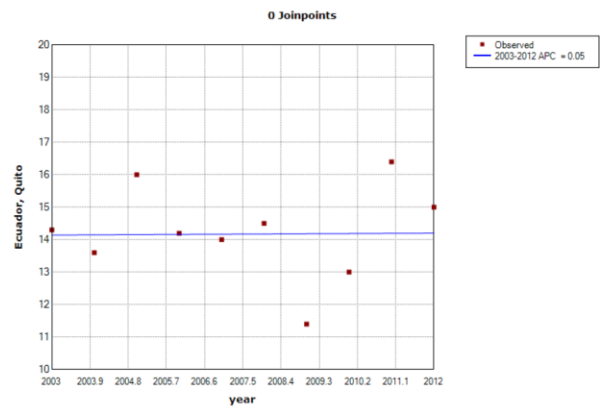

# Northern America

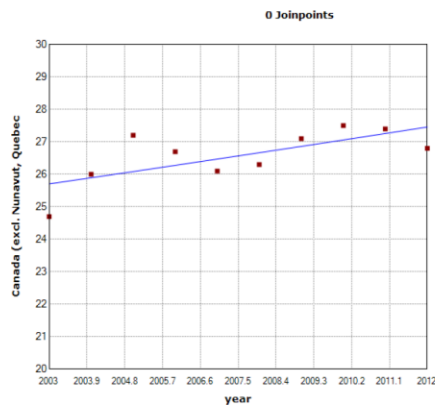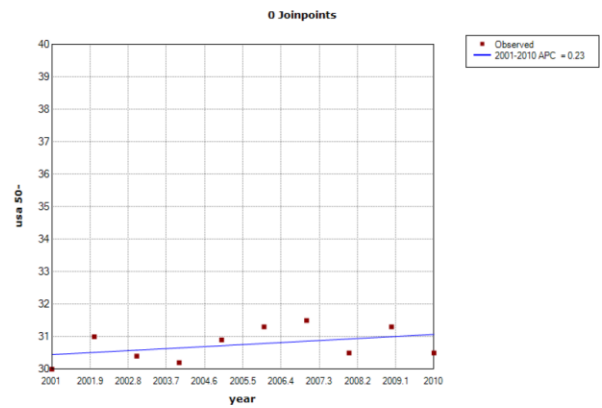

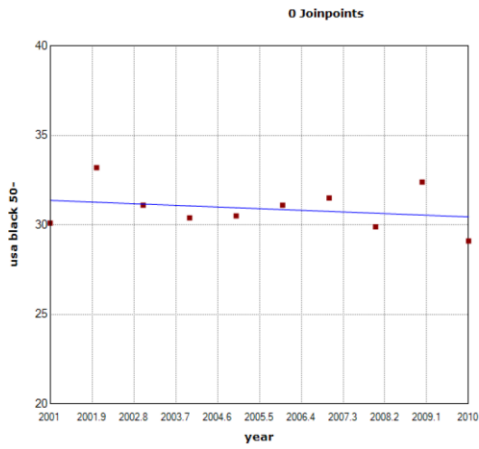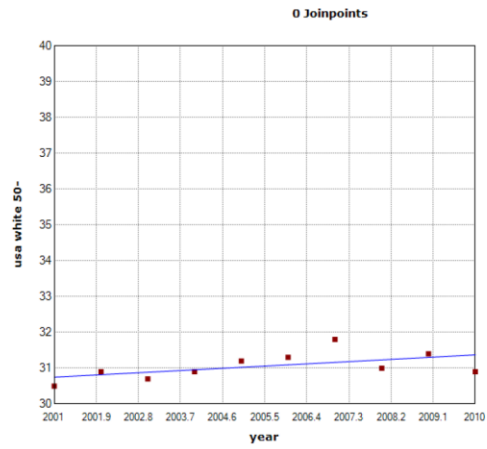

## Asia

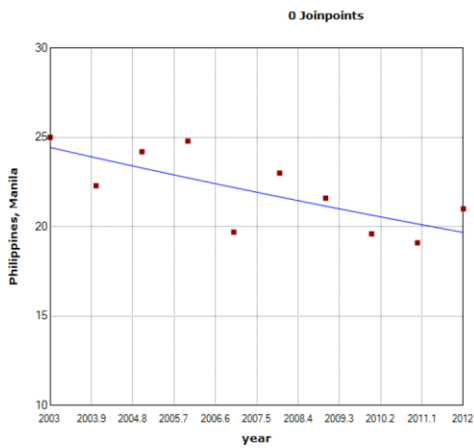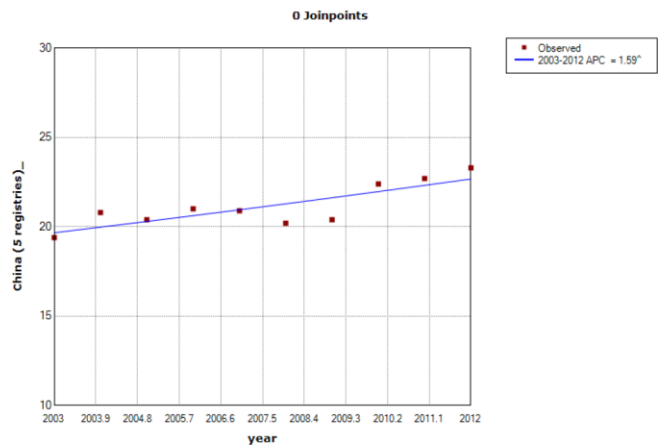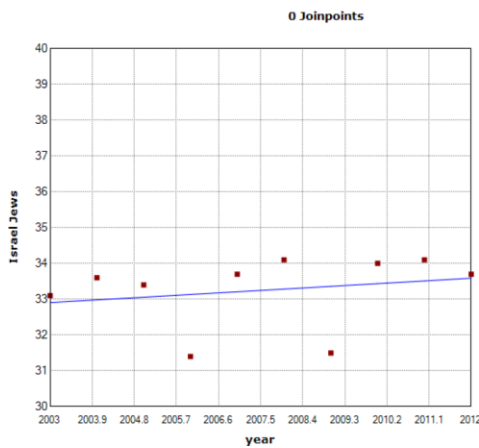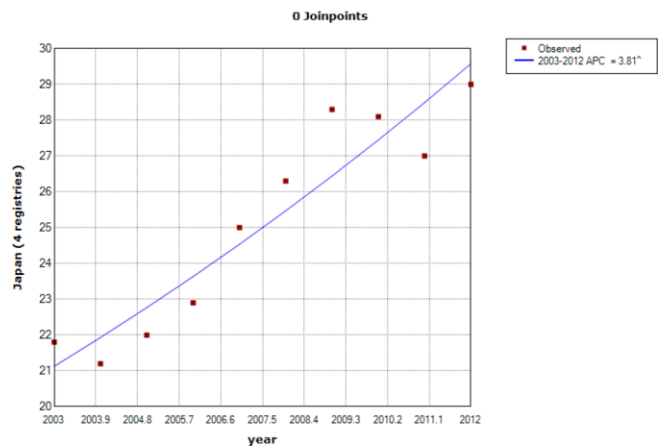



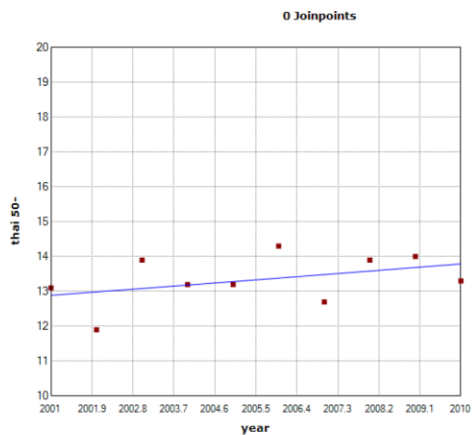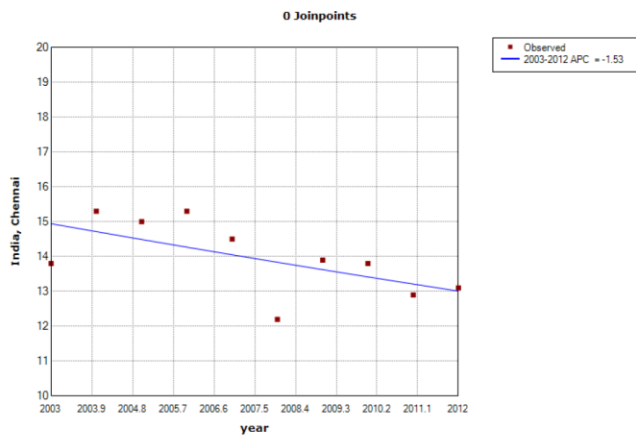

## Oceania

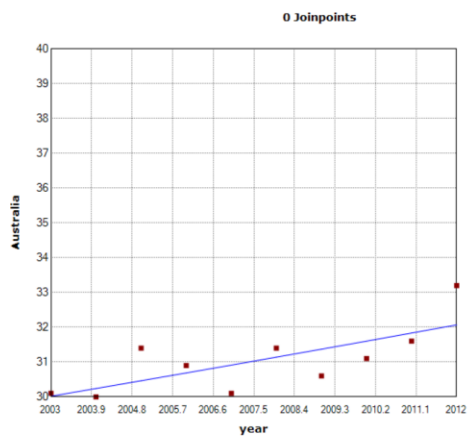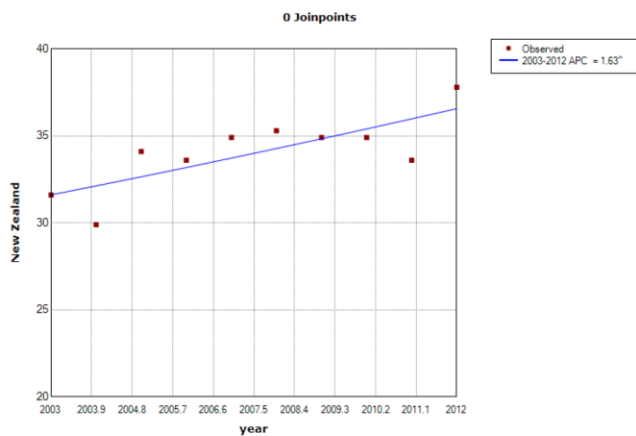

## Northern Europe

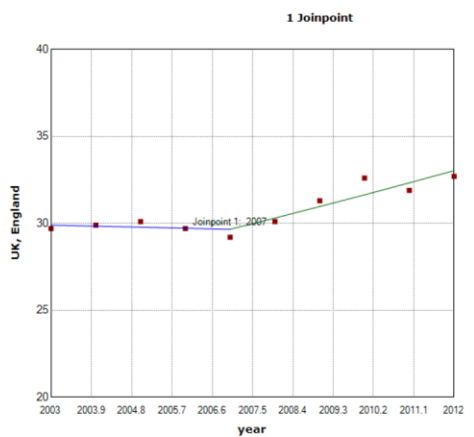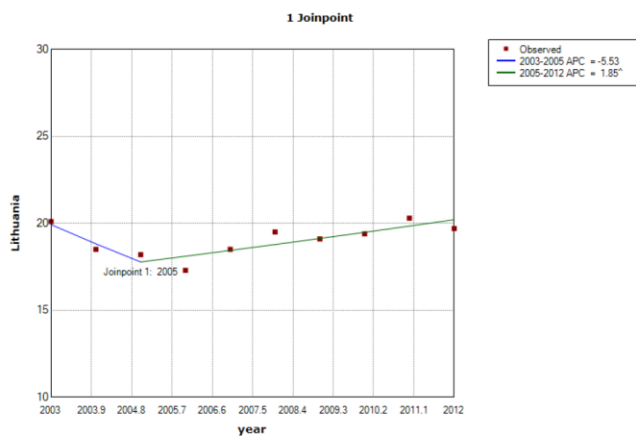

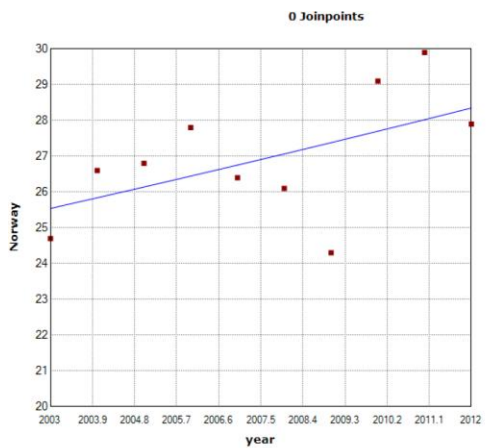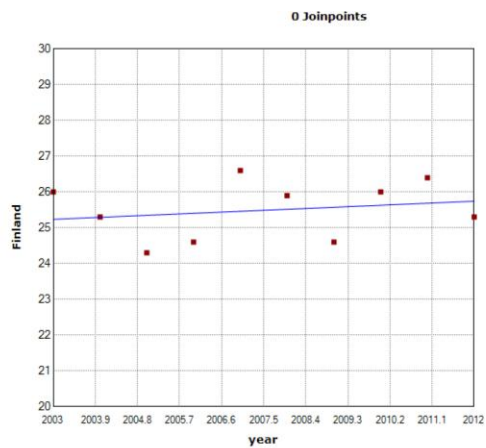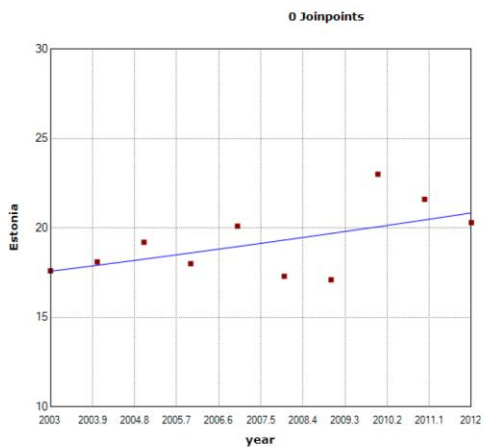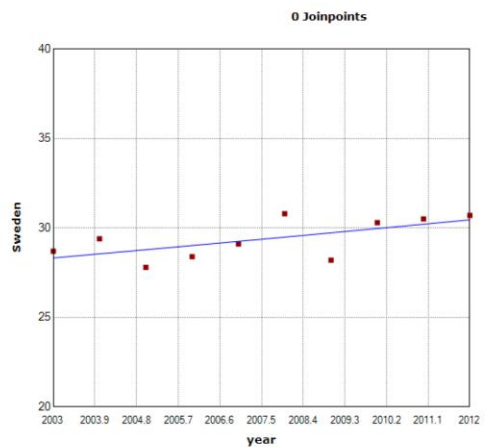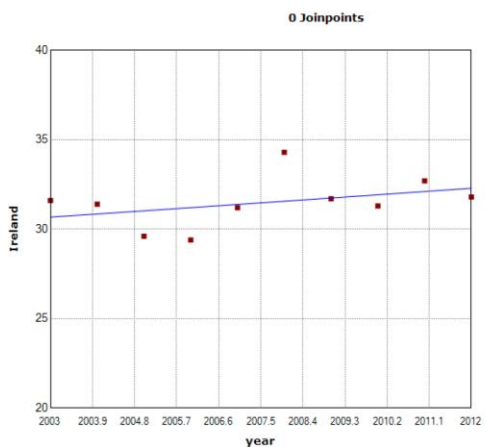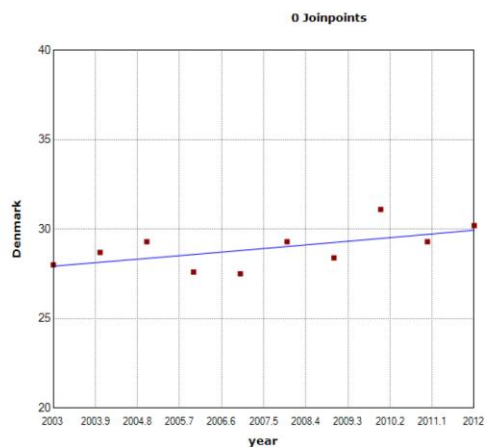

V

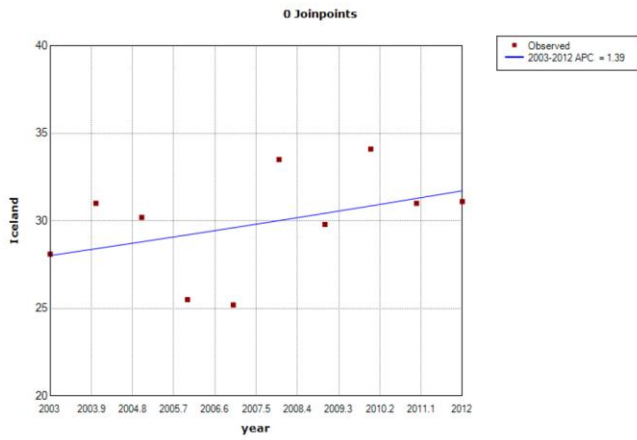

## Western Europe

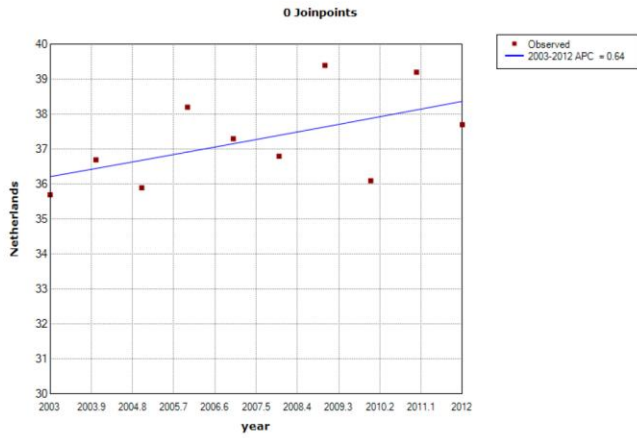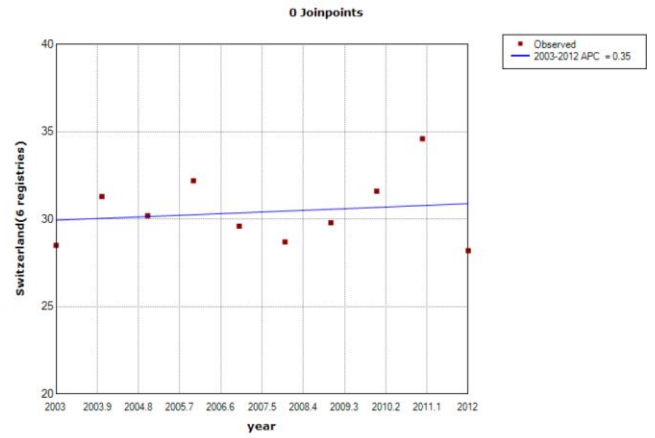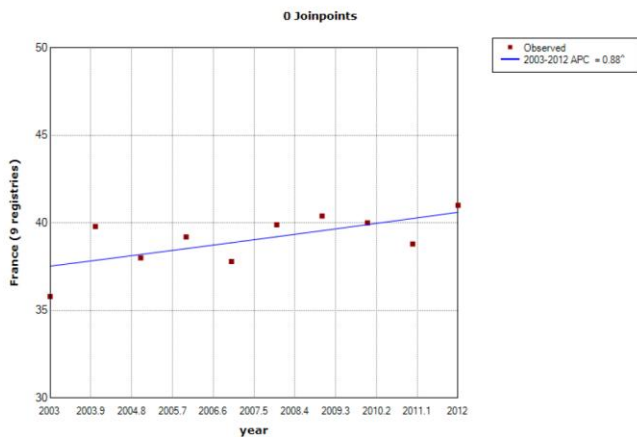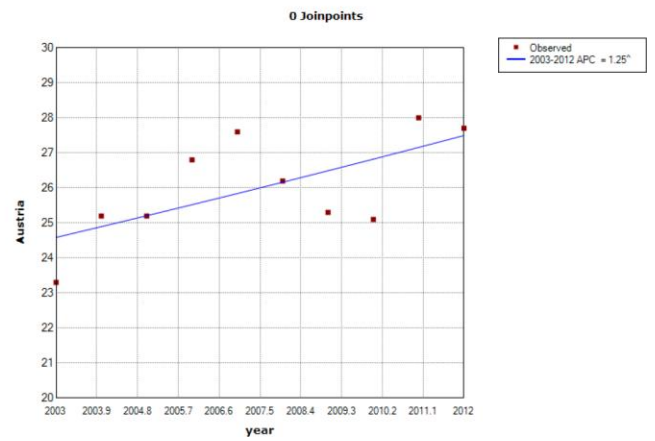

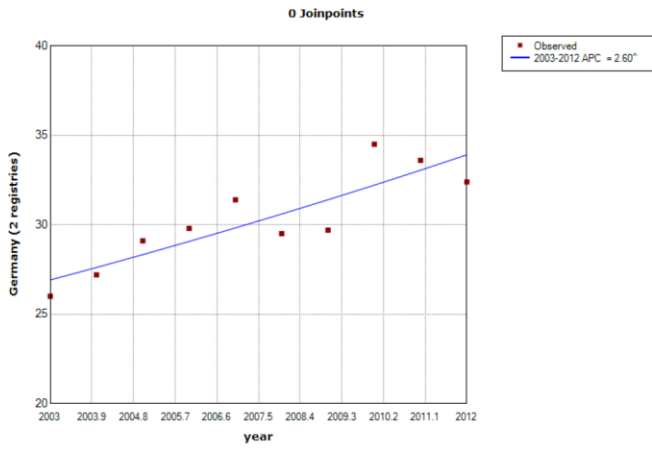

## Southern Europe

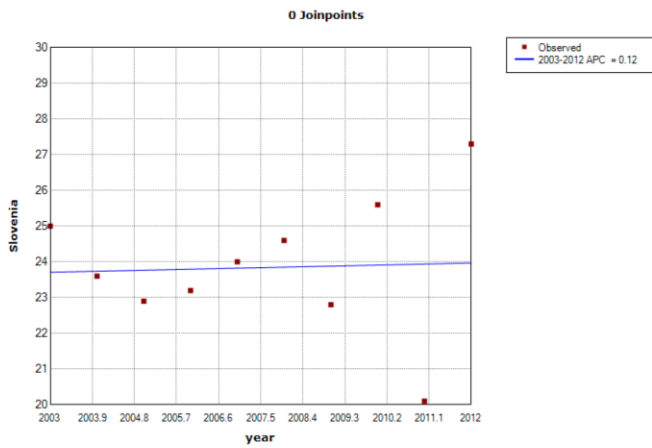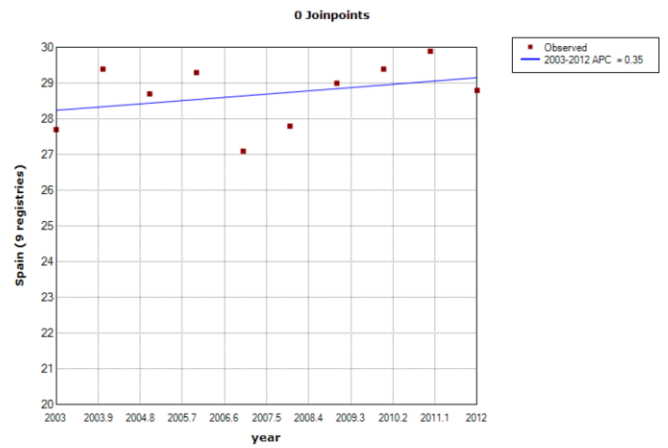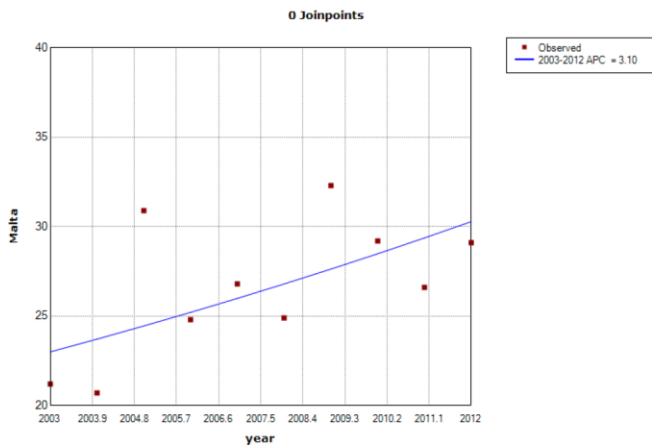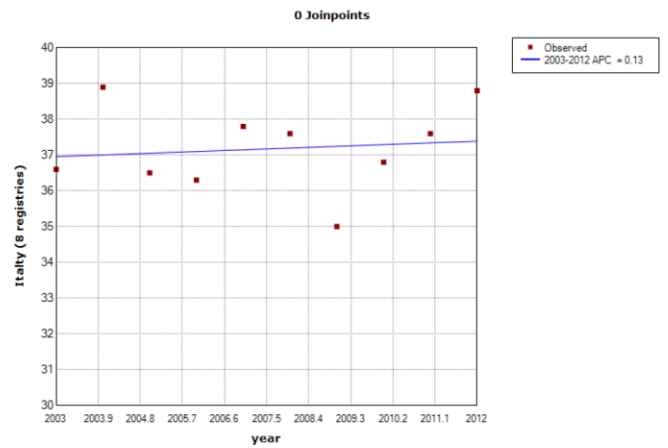

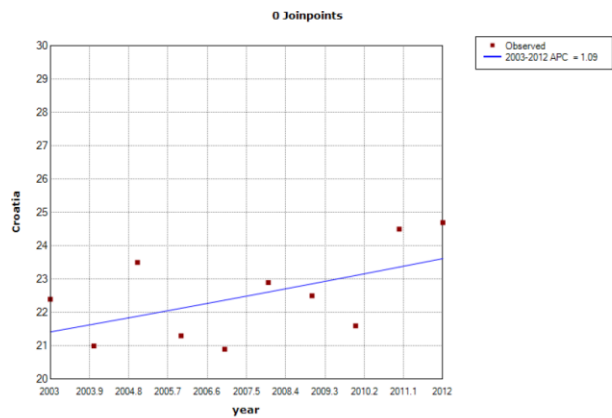

## Eastern Europe

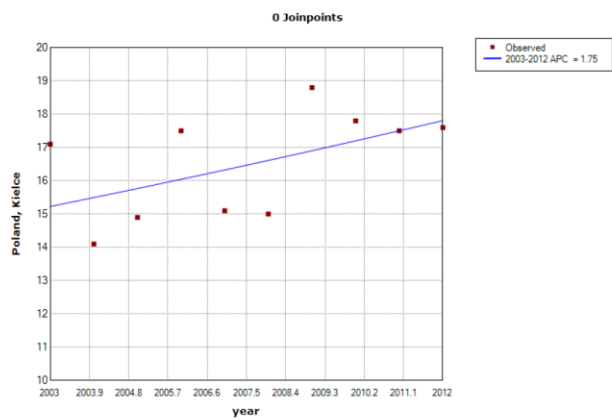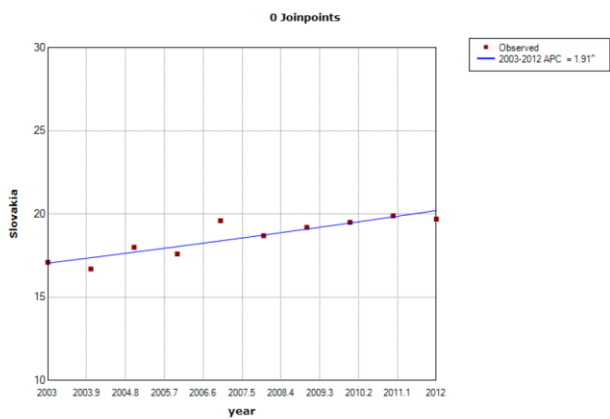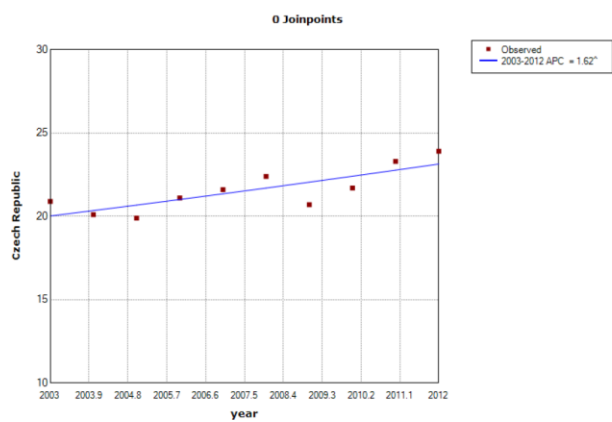

# Latin America & the Caribbean

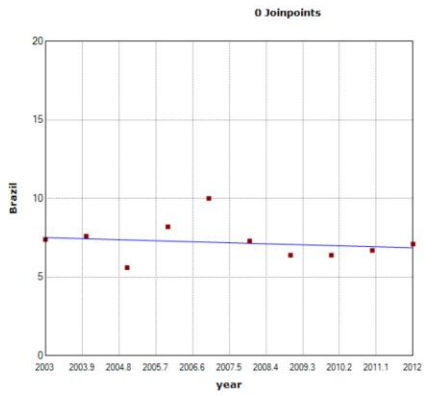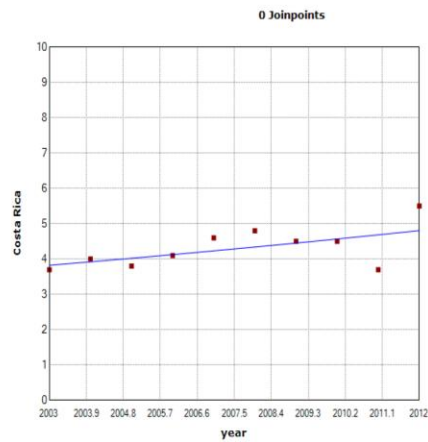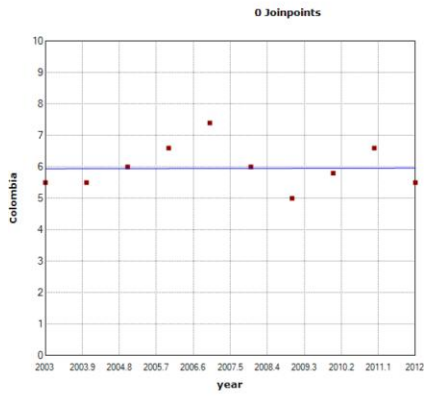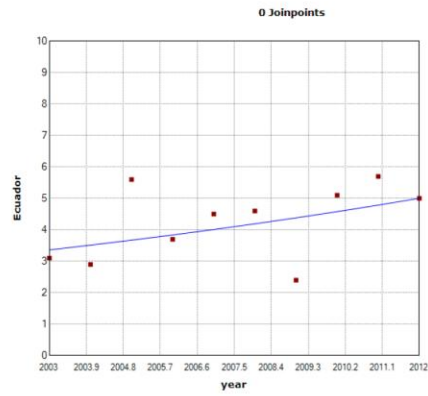

# Northern America

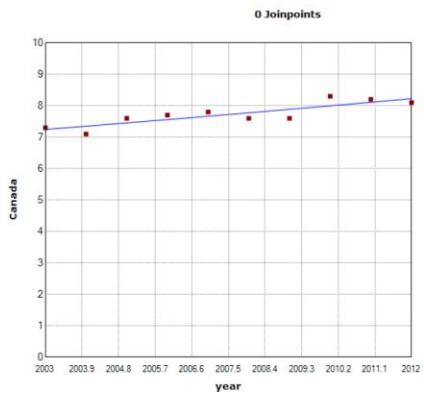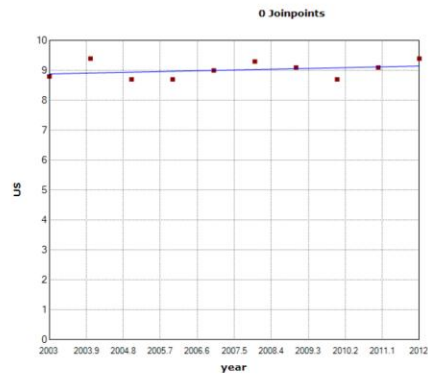

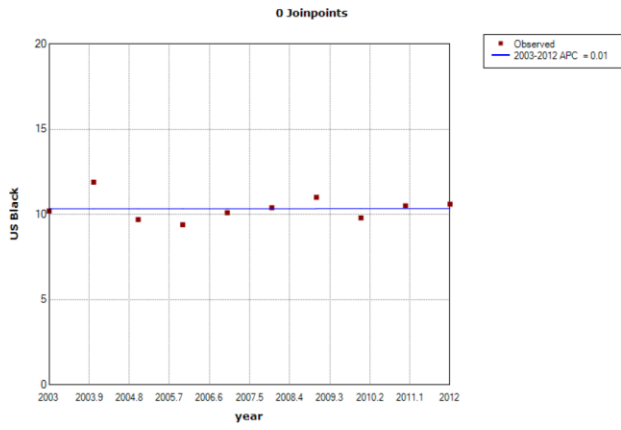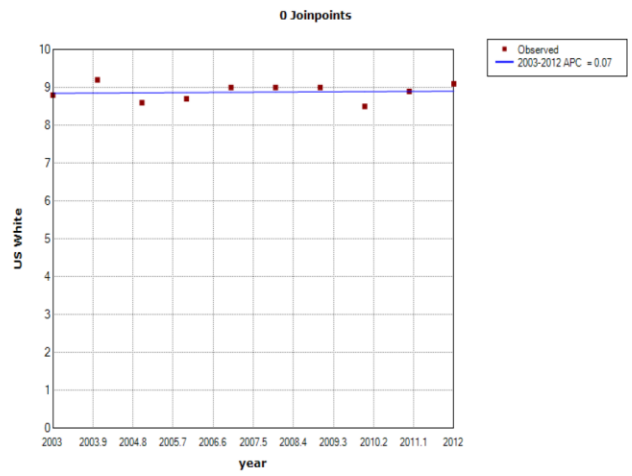

## Asia

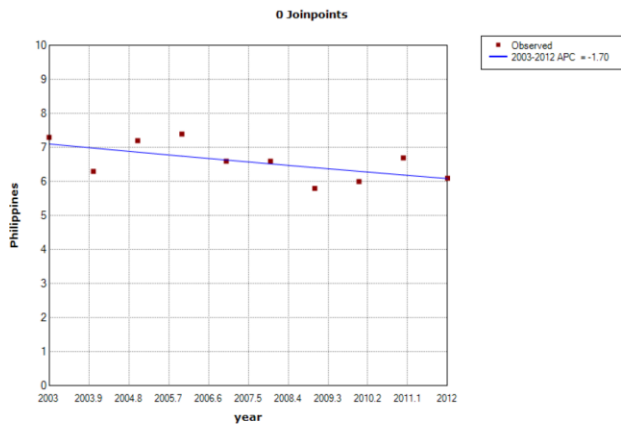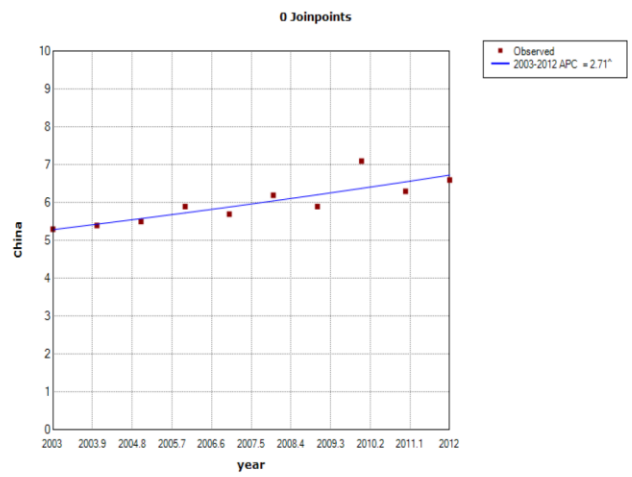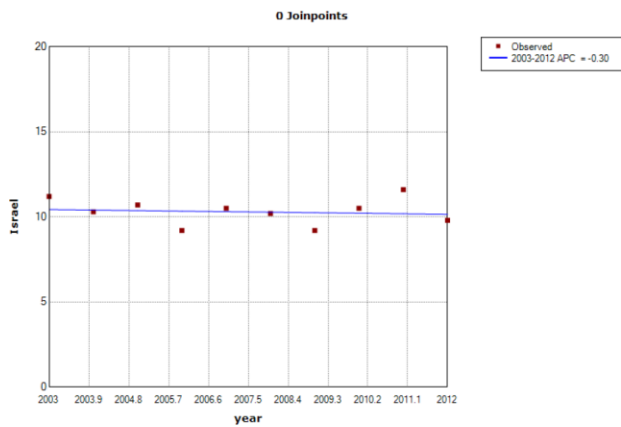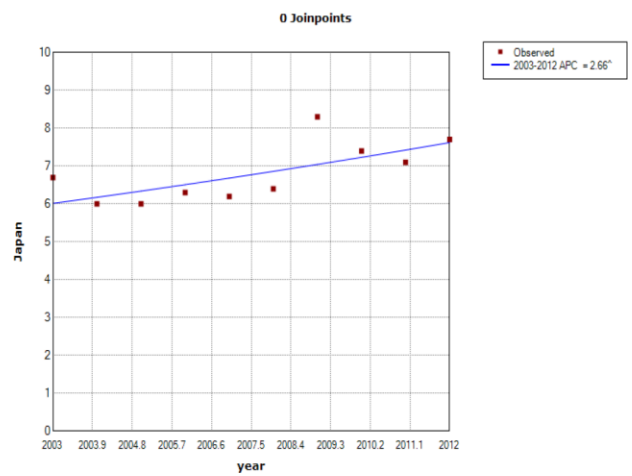

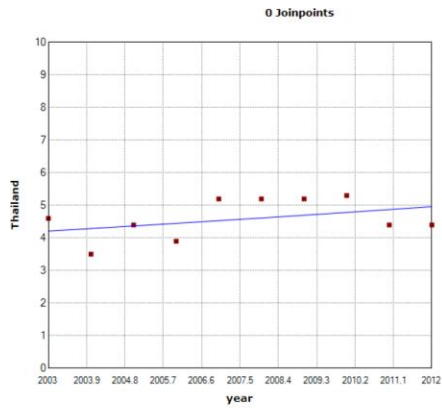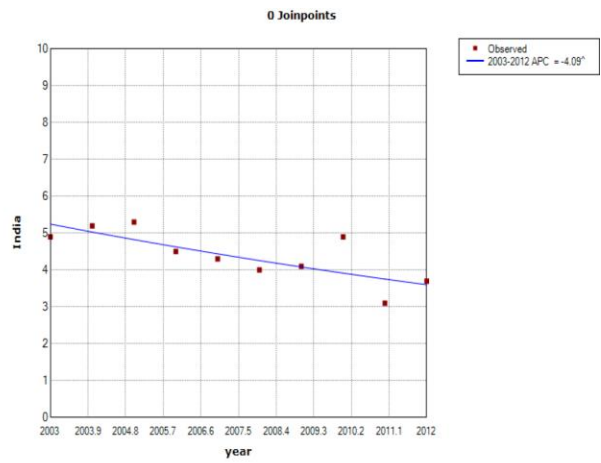

## Oceania

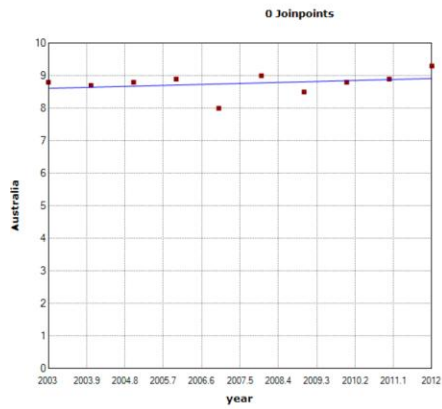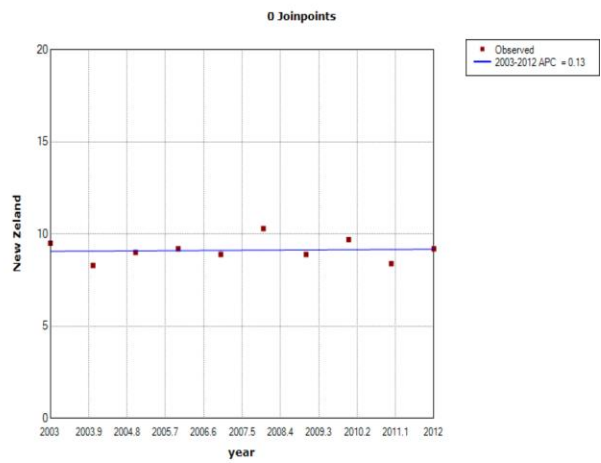

## Northern Europe

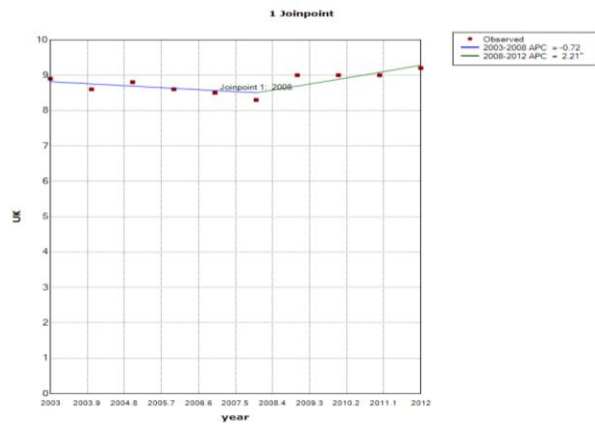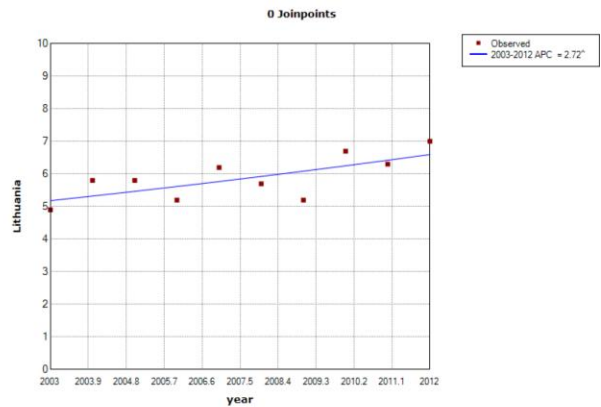



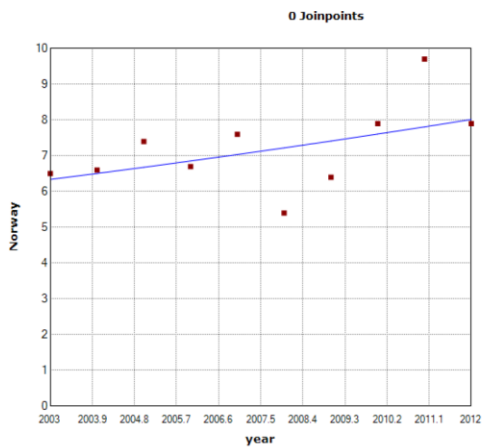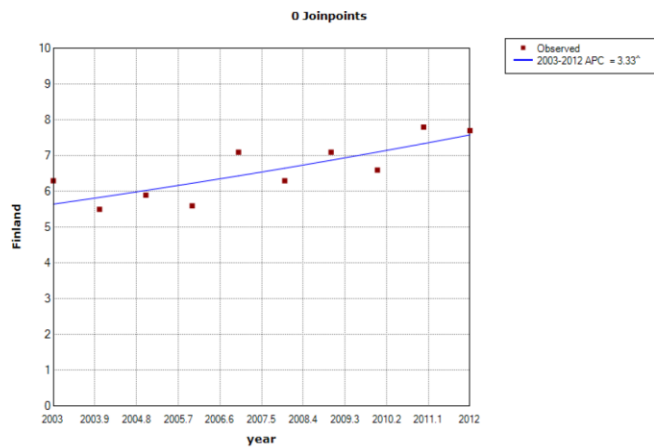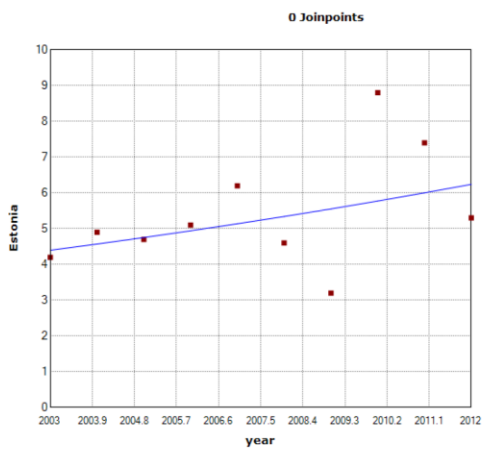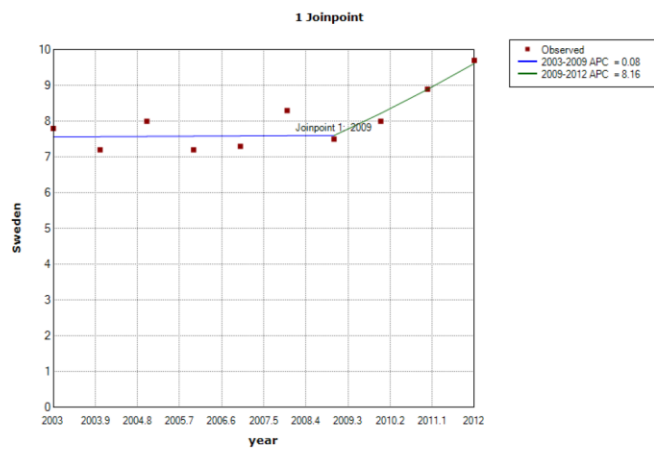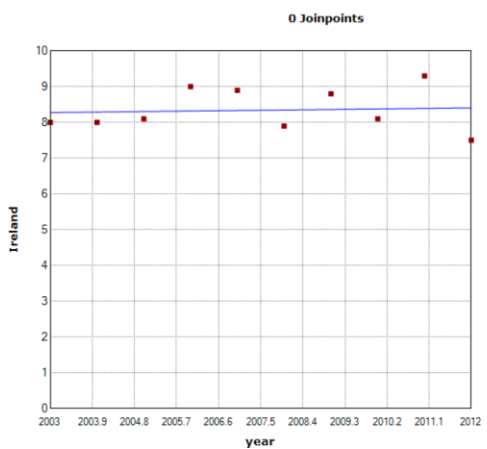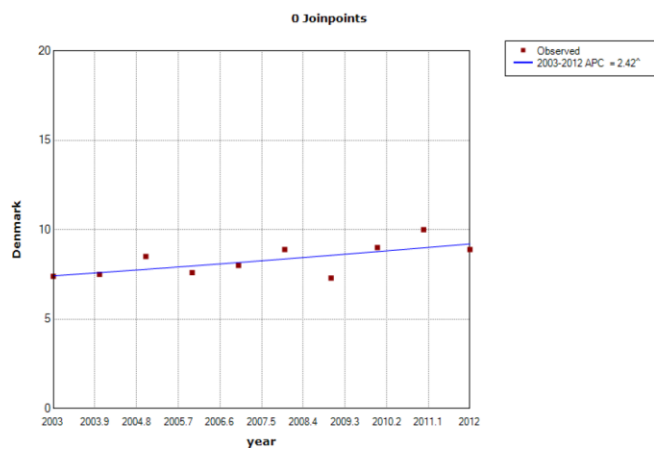

0 Joinpoints

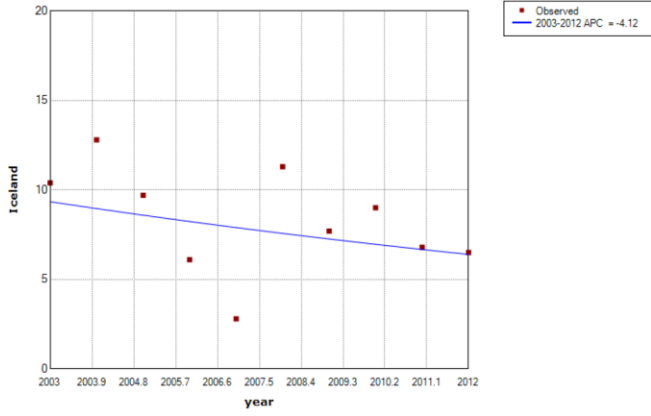

## Western Europe

0 Joinpoints

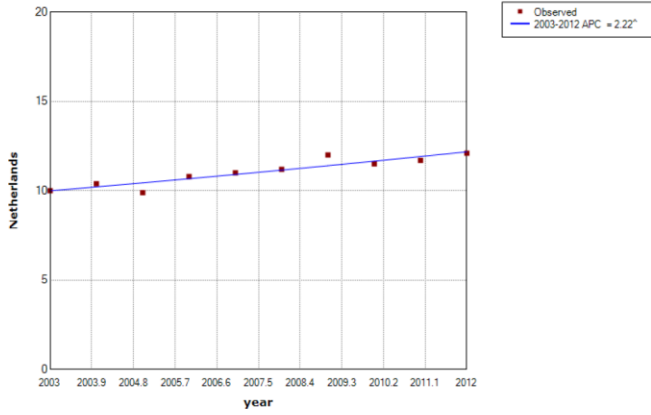

0 Joinpoints

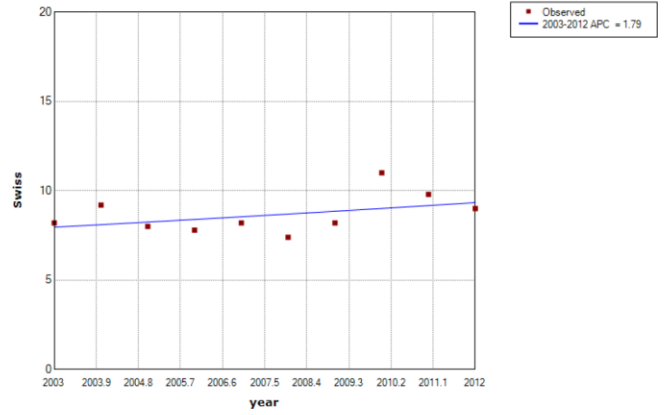

0 Joinpoints

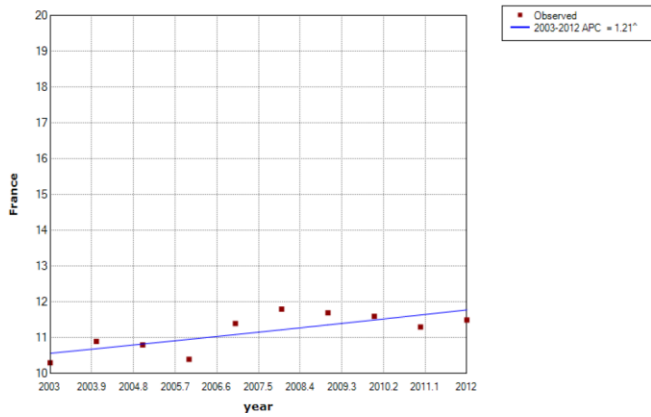

0 Joinpoints

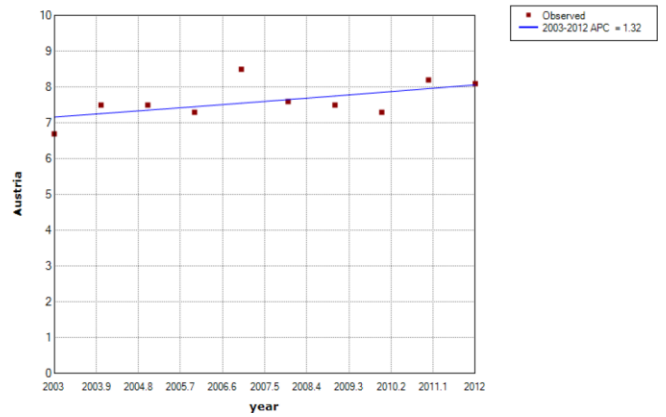

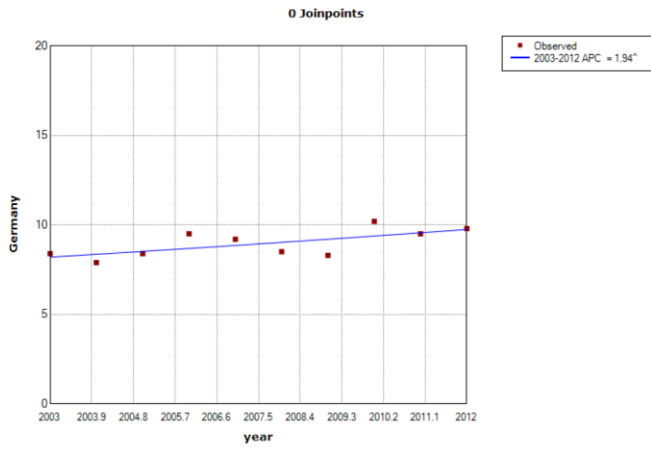

## Southern Europe

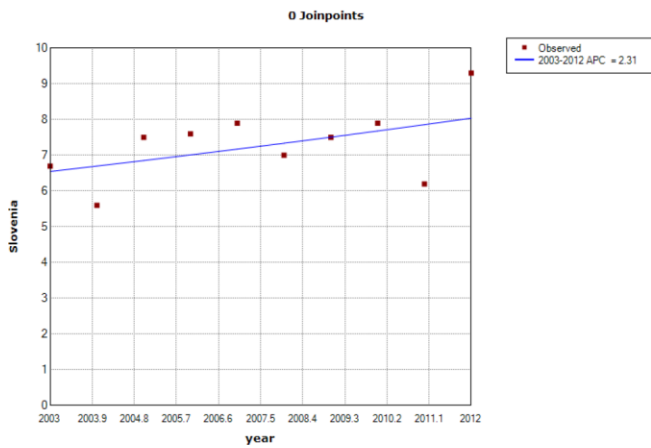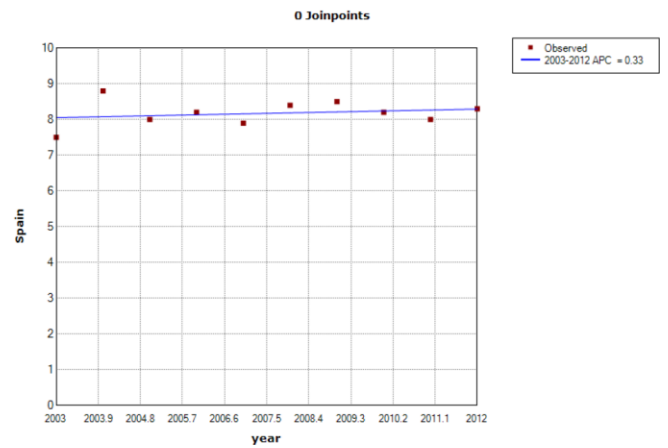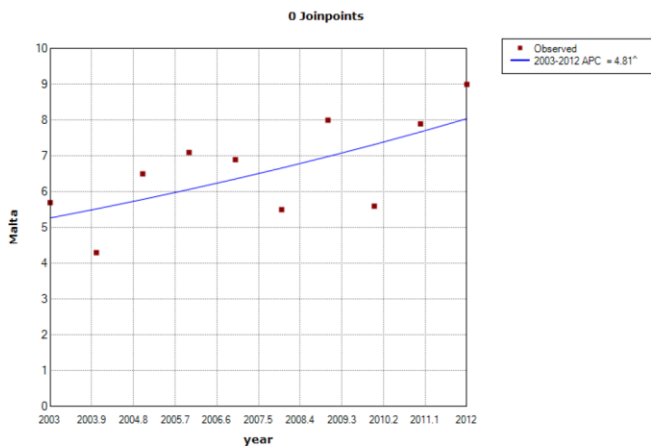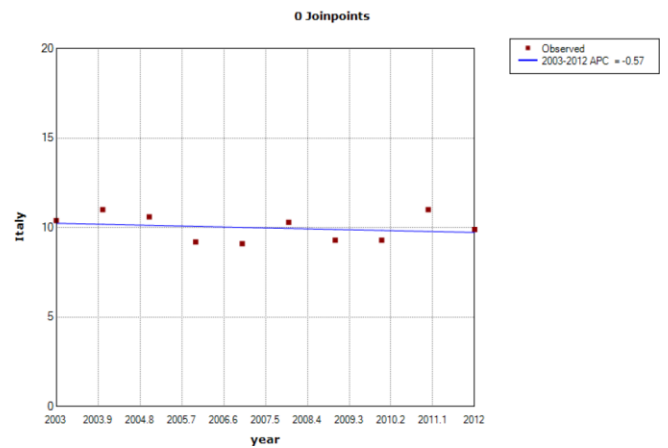

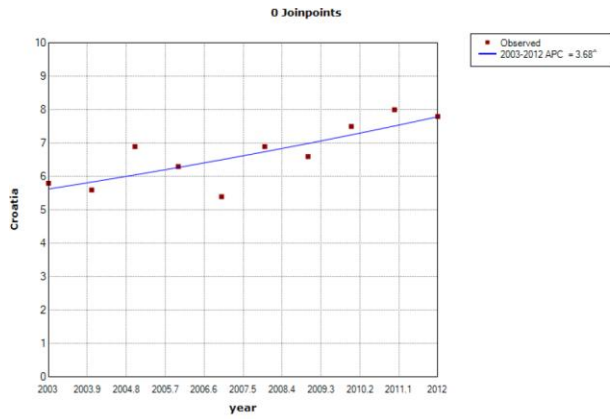

## Eastern Europe

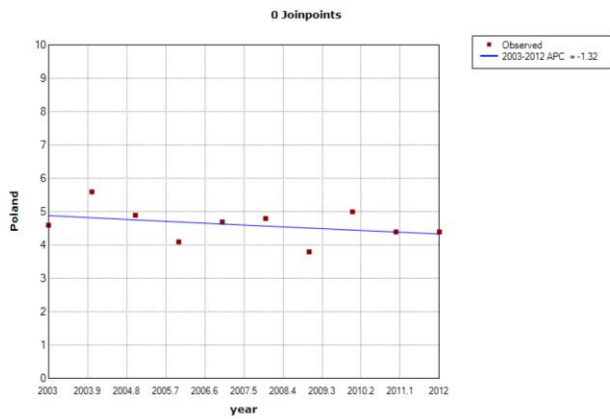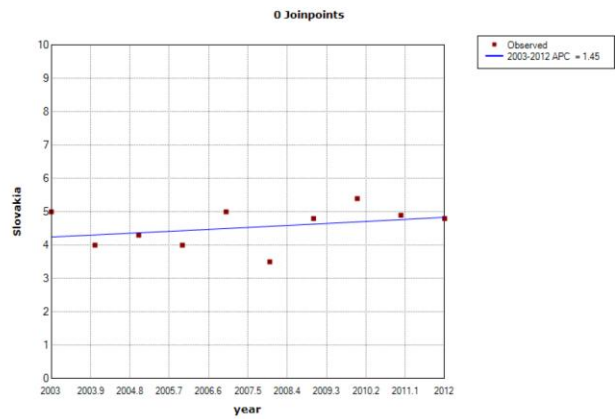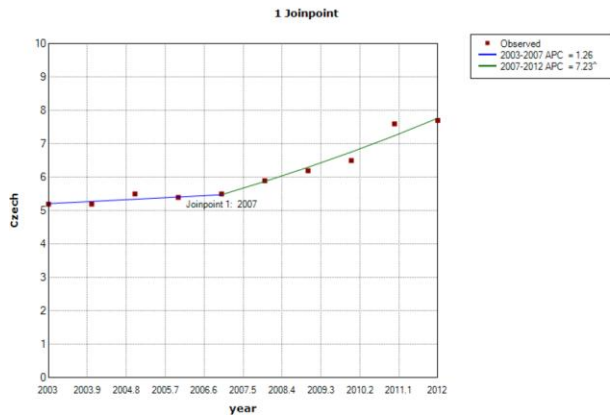

# Latin America & the Caribbean

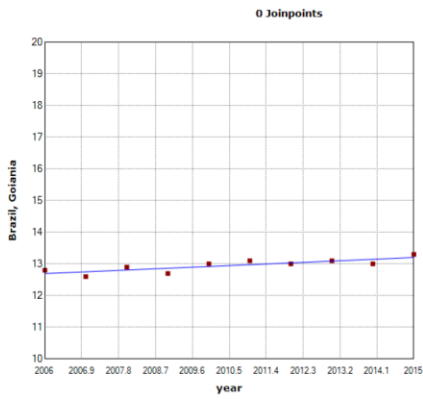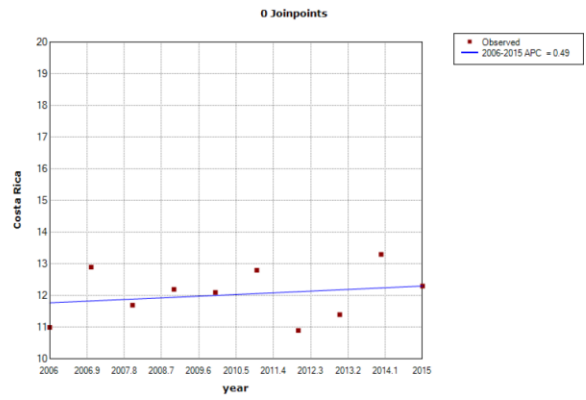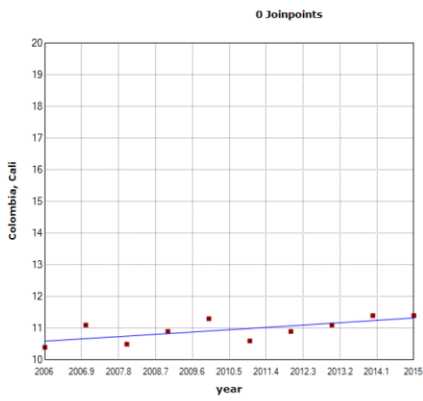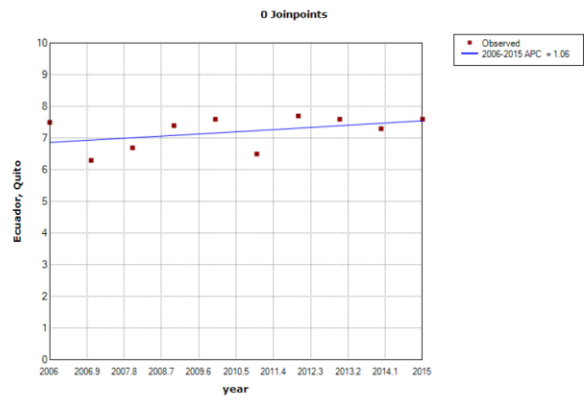

# Northern America

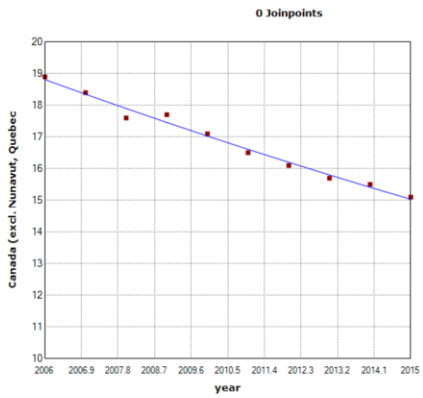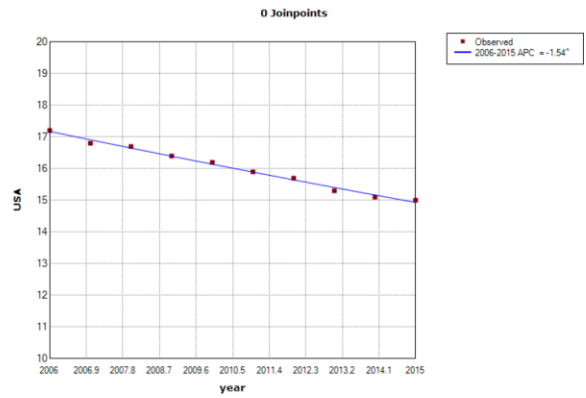

# Asia

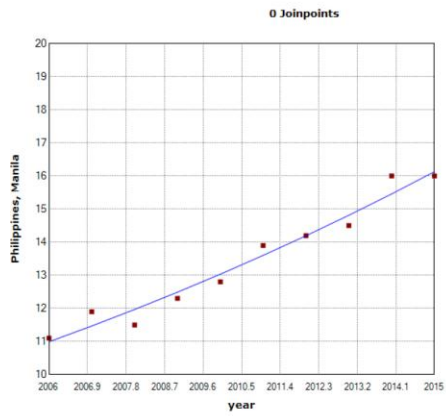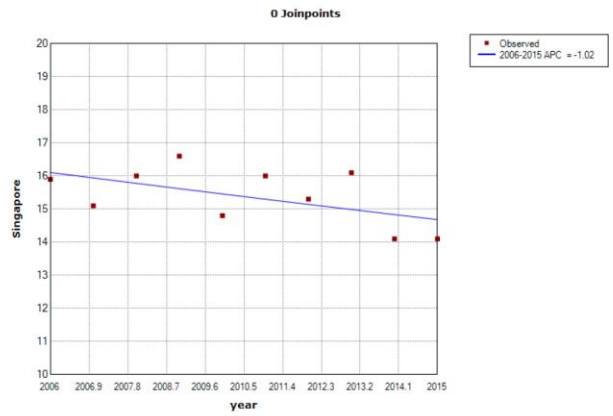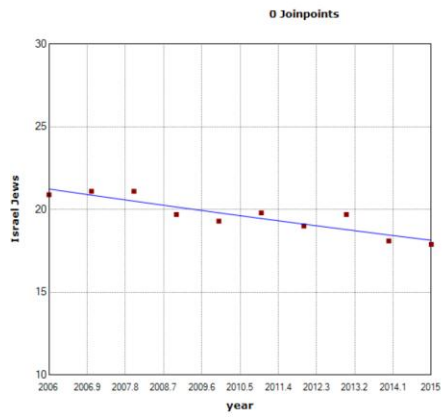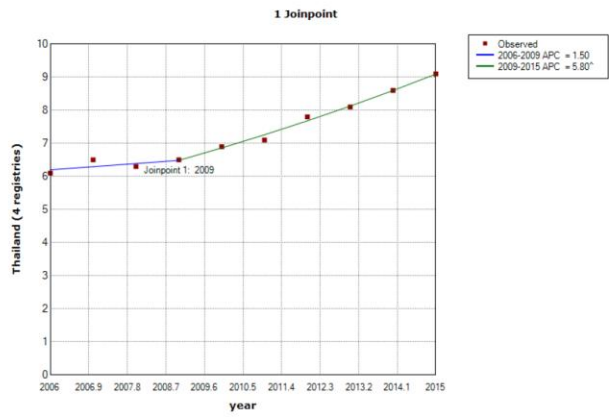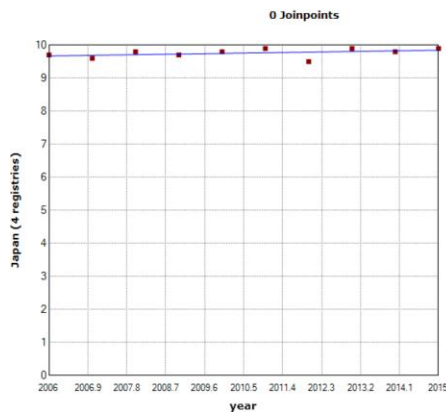

# Oceania

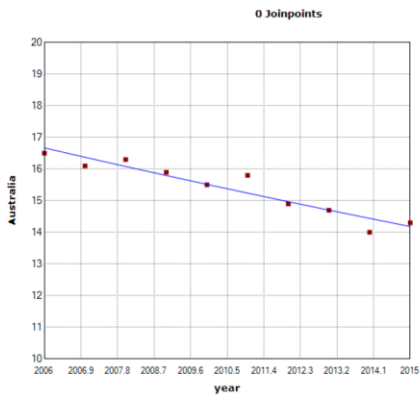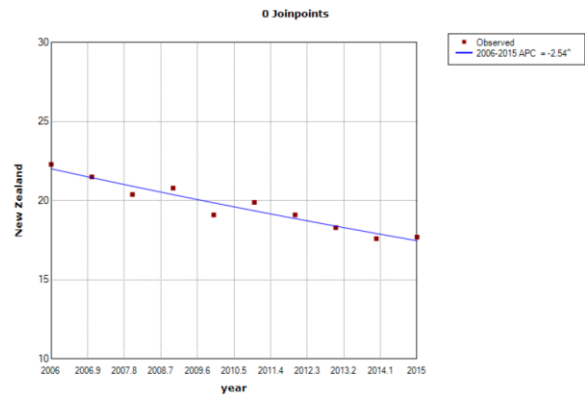

# Northern Europe

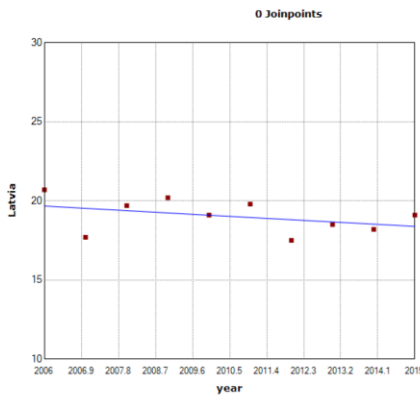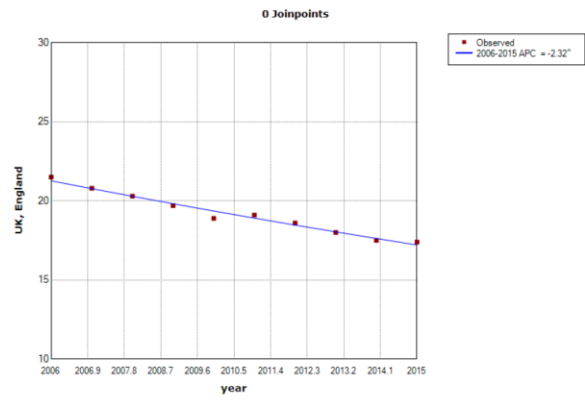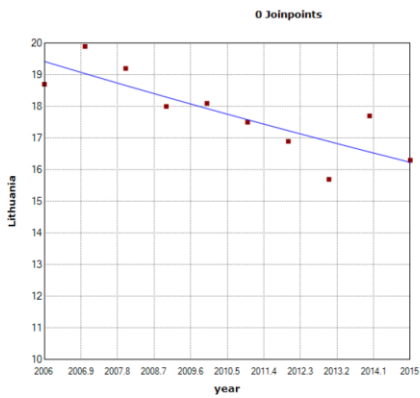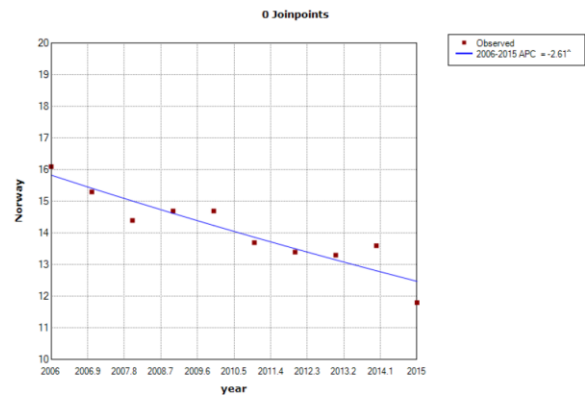

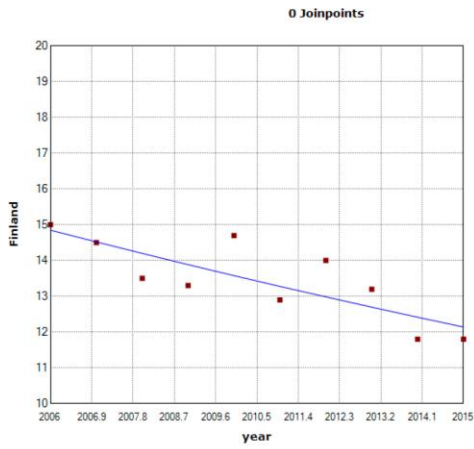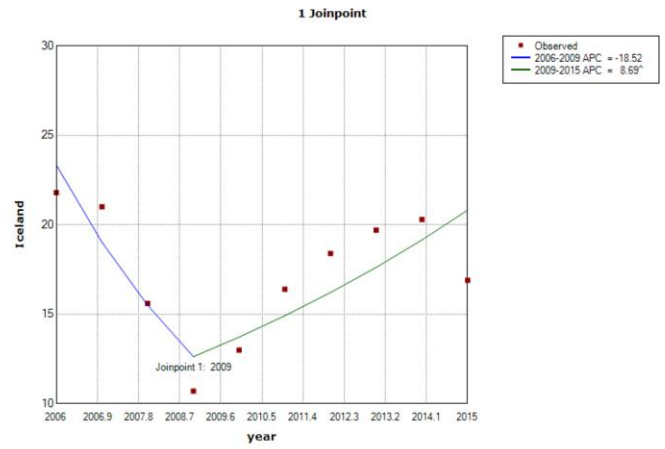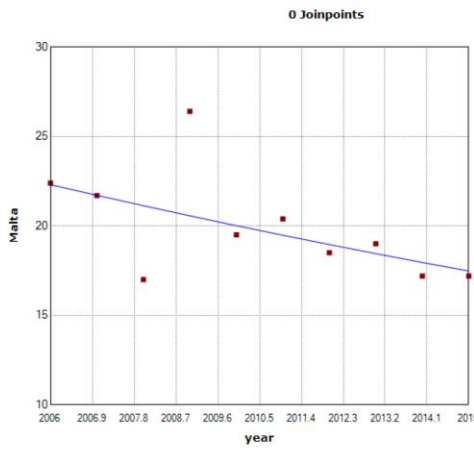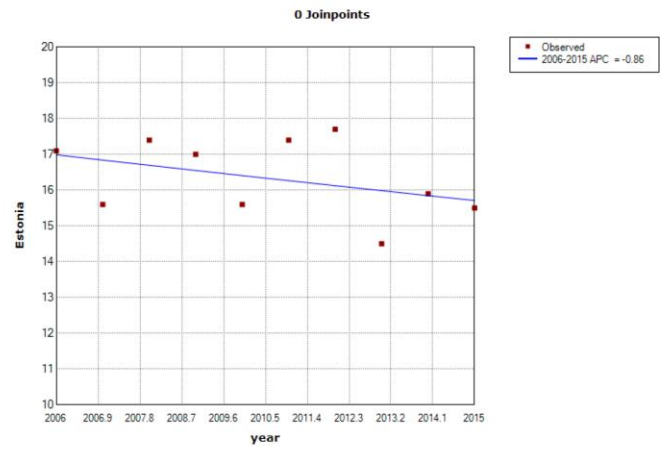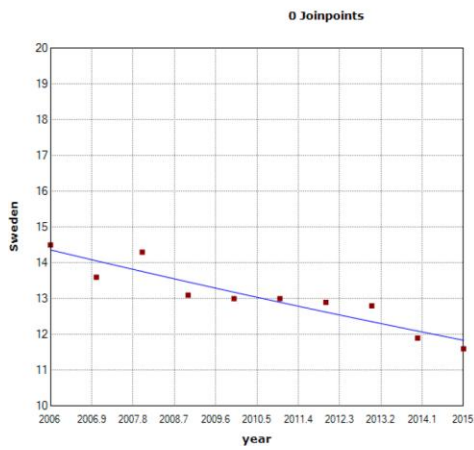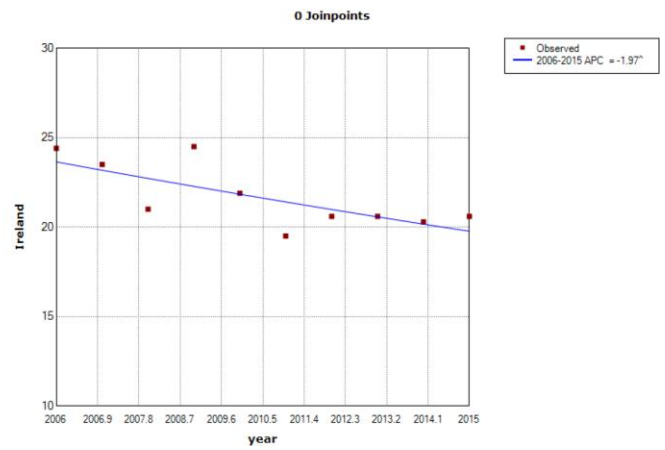



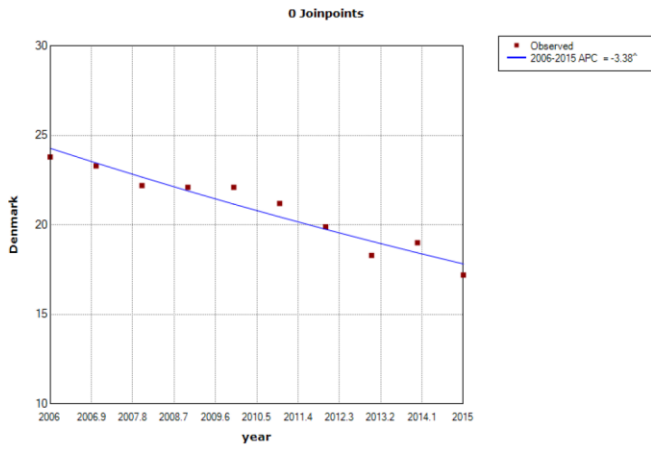

## Western Europe

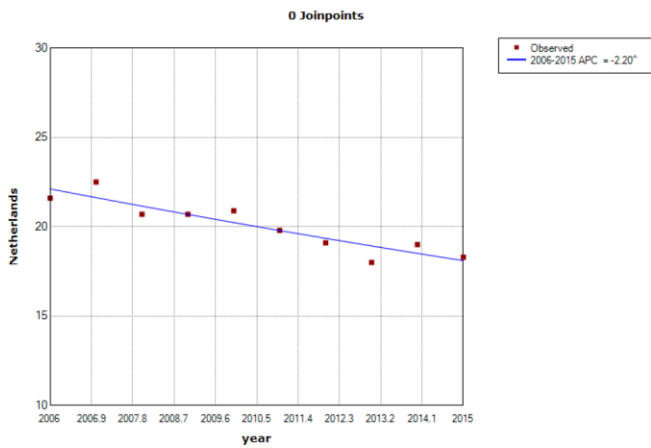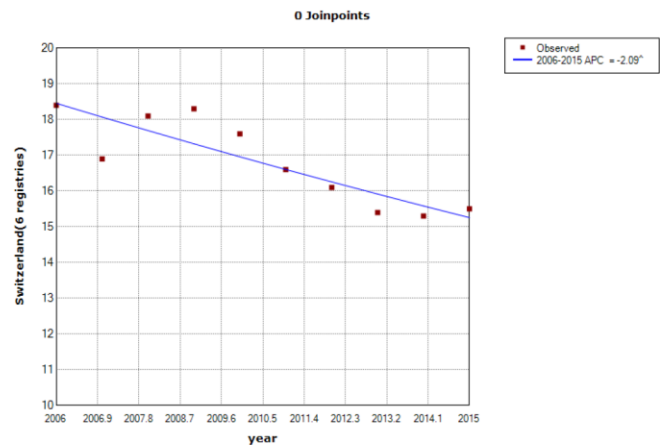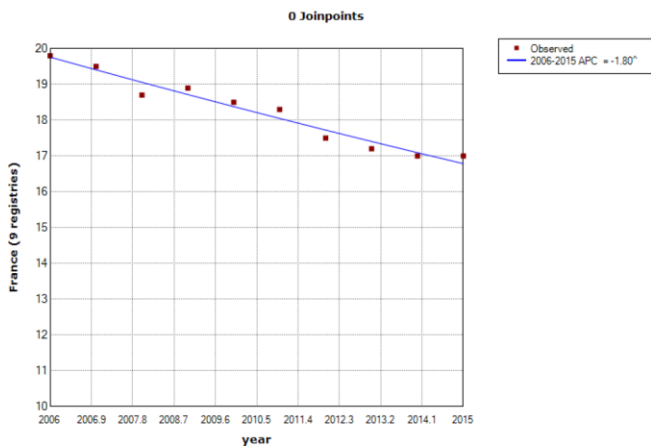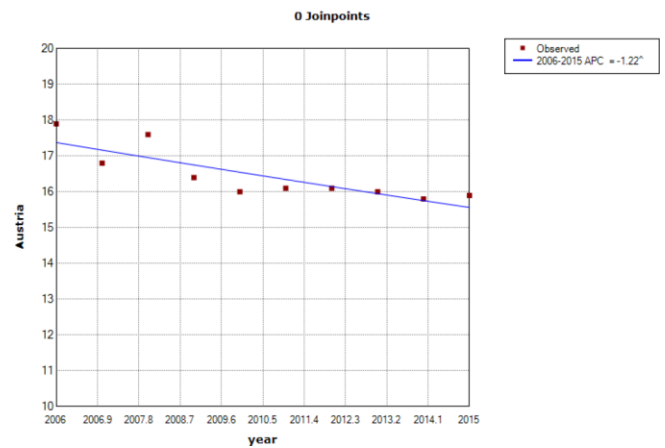

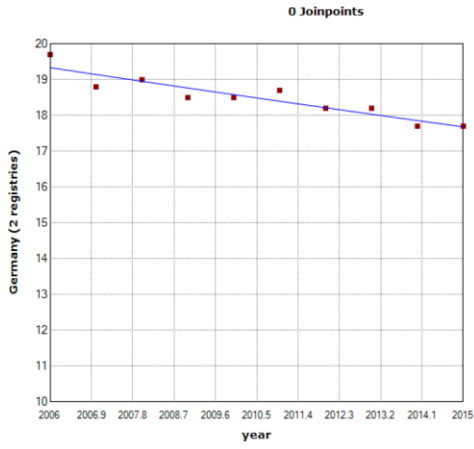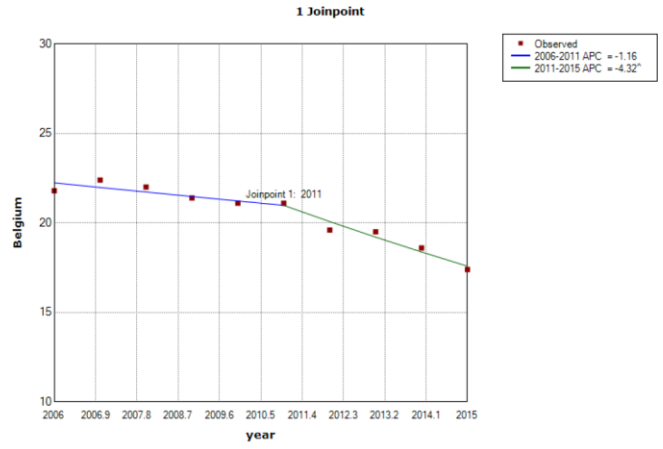

## Southern Europe

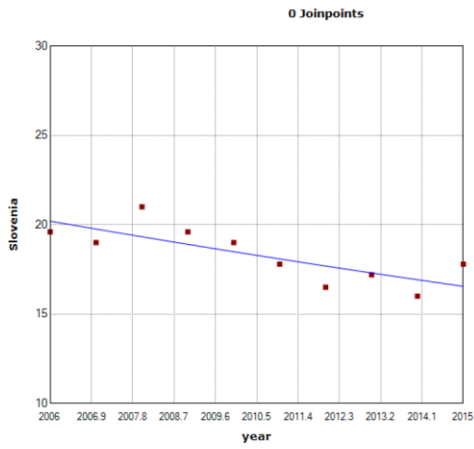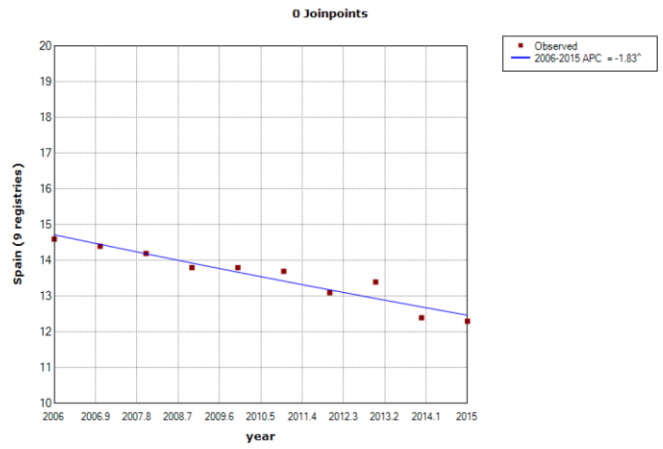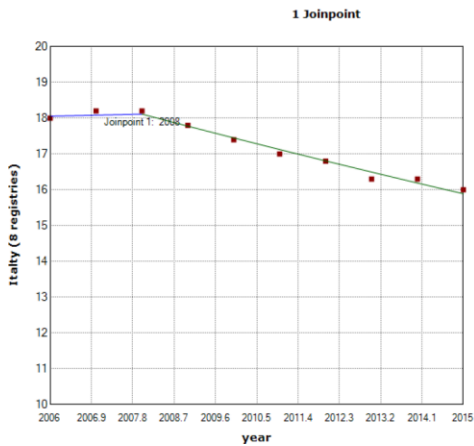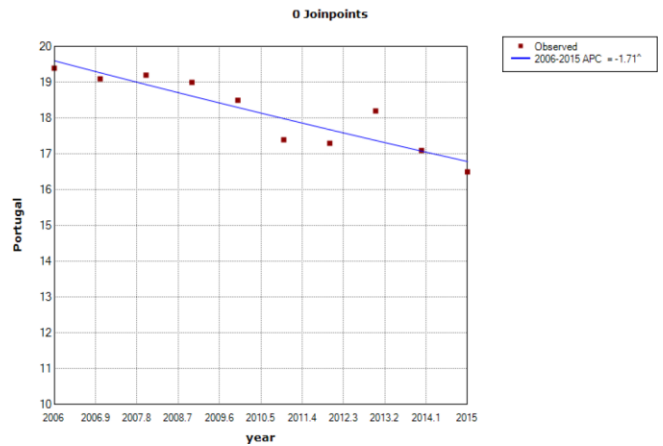

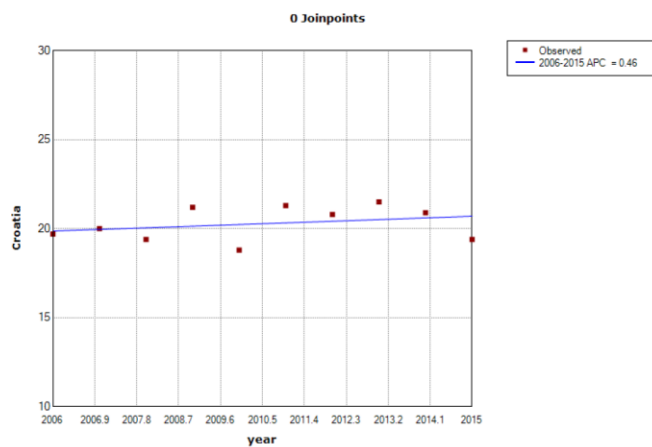

## Eastern Europe

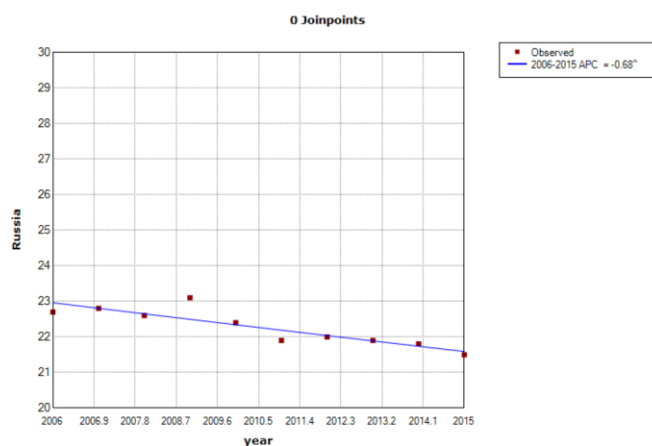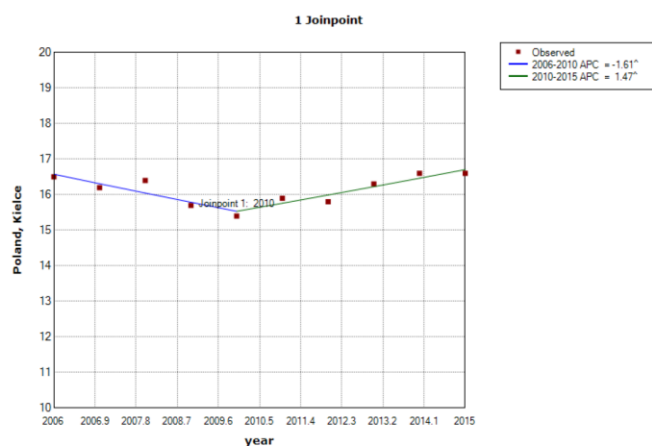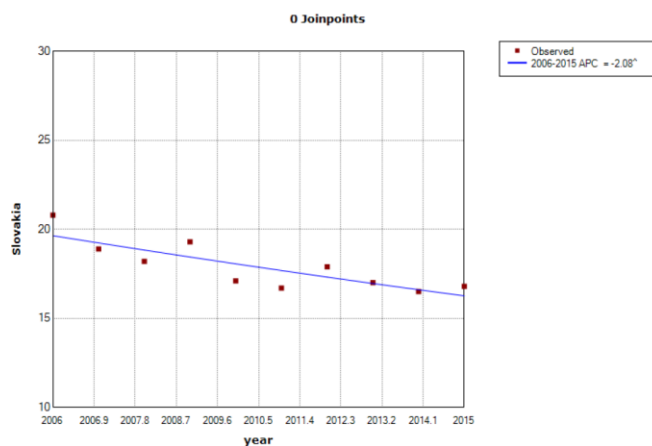

Supplementary Figure 2. The joinpoint regression analysis of breast cancer by country.
