# Supplementary material for: Global incidence and mortality of breast cancer: a trend analysis
Source: PubMed Central journal article supplement (PMC7950292; doi:10.18632/aging.202502), 2021-02-11
Supplement: aging-13-202502-s002.pdf [file aging-13-202502-s002.pdf]

## SUPPLEMENTARY TABLES

**Supplementary Table 1. The incidence/mortality of breast cancer by region.**

| Region                     | Incidence |           | Deaths    |           |
|----------------------------|-----------|-----------|-----------|-----------|
|                            | New cases | Cum. risk | New cases | Cum. risk |
| Eastern Africa             | 40 310    | 3.15      | 20 165    | 1.62      |
| Middle Africa              | 14 486    | 2.89      | 7 864     | 1.64      |
| Northern Africa            | 53 917    | 5.06      | 20 058    | 1.96      |
| Southern Africa            | 14 820    | 4.93      | 5 002     | 1.60      |
| Western Africa             | 45 157    | 3.92      | 20 983    | 1.92      |
| Caribbean                  | 14 097    | 5.50      | 5 496     | 1.95      |
| Central America            | 35 349    | 4.17      | 9 341     | 1.14      |
| South America              | 150 288   | 6.19      | 37 721    | 1.45      |
| North America              | 262 347   | 9.32      | 46 963    | 1.38      |
| Eastern Asia               | 476 509   | 4.15      | 119 678   | 0.93      |
| South-Eastern Asia         | 137 514   | 4.17      | 50 935    | 1.61      |
| South-Central Asia         | 241 077   | 2.81      | 123 060   | 1.53      |
| Western Asia               | 55 914    | 4.81      | 16 904    | 1.45      |
| Central and Eastern Europe | 149 024   | 6.10      | 49 951    | 1.80      |
| Western Europe             | 169 640   | 9.90      | 41 629    | 1.65      |
| Southern Europe            | 119 577   | 8.51      | 28 064    | 1.41      |
| Northern Europe            | 84 272    | 9.63      | 18 063    | 1.46      |
| Australia and New Zealand  | 22 062    | 10.16     | 3 631     | 1.37      |
| Melanesia                  | 2 116     | 5.30      | 1 046     | 2.73      |
| Polynesia                  | 252       | 7.46      | 78        | 2.46      |
| Micronesia                 | 121       | 4.44      | 47        | 1.71      |
| Low HDI                    | 105 620   | 3.40      | 52 846    | 1.78      |
| Medium HDI                 | 402 800   | 3.34      | 183 827   | 1.61      |
| High HDI                   | 666 731   | 4.29      | 184 014   | 1.12      |
| Very high HDI              | 912 469   | 8.16      | 205 616   | 1.44      |
| World                      | 2 088 849 | 5.03      | 626 679   | 1.41      |

**Supplementary Table 2. Data source of the age-standardized incidence/mortality.**

|                    | <b>Incidence</b>    | <b>Mortality</b>    |
|--------------------|---------------------|---------------------|
| Austria            | CI5 (1998-2012)     | WHO (1980-2016)     |
| Australia          | CI5 (1993-2012)     | WHO (1979-2015)     |
| Belgium            | n/a                 | WHO(1979-2015)      |
| Brazil             | CI5 (1993-2012)1    | WHO (1979-2015)     |
| Canada             | CI5 (1983-2012)2    | WHO (1979-2013)     |
| China              | CI5 (1998-2012)3    | n/a                 |
| Colombia           | CI5 (1983-2012)4    | WHO (1984-2015)     |
| Costa Rica         | CI5 (1982-2011)     | WHO (1980-2014)     |
| Croatia            | CI5 (1988-2012)     | WHO (1985-2016)     |
| Czech Republic     | CI5 (1983-2012)     | WHO (1986-2016)     |
| Denmark            | CI5 (1953-2012)     | WHO (1994-2015)     |
| Ecuador            | CI5 (1985-2012)5    | WHO (1979-2015)     |
| Estonia            | CI5 (1983-2012)     | WHO (1981-2015)     |
| Finland            | NORDCAN (1953-2015) | NORDCAN (1953-2015) |
| France             | CI5 (1998-2011)6    | WHO (1979-2014)     |
| Germany            | CI5 (1998-2012)7    | WHO (1990-2015)     |
| Iceland            | CI5 (1958-2012)     | WHO (1981-2016)     |
| India              | CI5(1983-2012)8     | n/a                 |
| Ireland            | CI5 (1994-2012)     | WHO (1979-2014)     |
| Israel             | CI5 (1963-2012)9    | WHO (1979-2015)     |
| Italy              | CI5 (1998-2010)10   | WHO (1979-2015)     |
| Japan              | CI5 (1998-2010)11   | WHO (1979-2015)     |
| Latvia             | n/a                 | WHO (1980-2015)     |
| Lithuania          | CI5 (1988-2012)     | WHO (1981-2016)     |
| Malta              | CI5 (1993-2012)     | WHO(1979-2015)      |
| Netherlands        | CI5 (1989-2012)     | WHO (1979-2016)     |
| New Zealand        | CI5 (1983-2012)     | WHO (1979-2013)     |
| Norway             | CI5 (1953-2012)     | WHO (1986-2015)     |
| Philippines        | CI5 (1983-2012)12   | WHO (1992-2011)     |
| Poland             | CI5 (1998-2012)13   | WHO (1980-2015)     |
| Portugal           | n/a                 | WHO (1980-2014)     |
| Russian Federation | n/a                 | WHO (1980-2015)     |
| Singapore          | n/a                 | WHO (1979-2015)     |
| Slovakia           | CI5(1971-2010)      | WHO (1992-2014)     |
| Slovenia           | CI5(1983-2012)      | WHO (1985-2015)     |
| Spain              | CI5 (1993-2010)14   | WHO (1980-2015)     |
| Sweden             | NORDCAN (1960-2015) | NORDCAN (1952-2015) |
| Switzerland        | CI5 (1998-2012)15   | WHO (1995-2015)     |
| Thailand           | CI5 (1993-2012)16   | WHO (1979-2016)     |
| United Kingdom     | CI5 (1994-2012)17   | WHO (1979-2015)     |
| USA                | SEER(1975-2015)     | SEER(1975-2015)     |
| USA Black          | SEER(1975-2015)     | SEER(1975-2015)     |
| USA White          | SEER(1975-2015)     | SEER(1975-2015)     |

n/a" not available; CI5: Cancer Incidence in Five Continents V; NORDCAN: Nordic Cancer Registries' SEER: USA: National Institutes of Health (NIH); WHO: World Health Organization.

1. Brazil, Goiania
2. Canada (excl. Nunavut, Quebec and Yukon)
3. China (5 registries)
4. Colombia, Cali
5. Ecuador, Quito
6. France (9 registries)
7. Germany (2 registries)
8. India, Chennai
9. Israel: Jews
10. Italy (8 registries)
11. Japan (4 registries)
12. Philippines, Manila
13. Poland, Kielce
14. Spain (9 registries)
15. Switzerland (6 registries)
16. Thailand (4 registries)
17. UK, England

## **REFERENCE**

1. SEER: <http://seer.cancer.gov/data/seerstat/>
2. NORDCAN: <http://www-dep.iarc.fr/NORDCAN/english/frame.asp>
3. WHO: <http://apps.who.int/healthinfo/statistics/mortality/whodpms/>
4. CI5: [http://ci5.iarc.fr/CI5plus/Pages/table1\\_sel.aspx](http://ci5.iarc.fr/CI5plus/Pages/table1_sel.aspx)
